# Supplementary material for: Kingianic Acids A–G, Endiandric Acid Analogues from Endiandra kingiana
Source: PubMed Central journal article supplement (PMC6270856; doi:10.3390/molecules19021732), 2014-01-31
Supplement: molecules-19-01732-s001.pdf [file molecules-19-01732-s001.pdf]

# Supplementary Materials

## Supplementary Information.

---

|                                                                                                                                               |         |
|-----------------------------------------------------------------------------------------------------------------------------------------------|---------|
| Structures of kingianic acid A-G ( <b>1–7</b> ), endiandric acid M ( <b>8</b> ), tsangibeilin B ( <b>9</b> ), and endiandric acid <b>10</b> . | S2      |
| X-ray crystallographic analysis of endiandric acid ( <b>10</b> )                                                                              | S3      |
| X-ray crystallographic analysis of tsangibeilin B ( <b>9</b> )                                                                                | S4      |
| HRESIMS for kingianic acid A ( <b>1</b> )                                                                                                     | S5      |
| NMR spectra for kingianic acid A ( <b>1</b> ) in CDCl <sub>3</sub>                                                                            | S5–S6   |
| HRESIMS for kingianic acid B ( <b>2</b> )                                                                                                     | S7      |
| NMR spectra for kingianic acid B ( <b>2</b> ) in CDCl <sub>3</sub>                                                                            | S7–S8   |
| HRESIMS for kingianic acid C ( <b>3</b> )                                                                                                     | S9      |
| NMR spectra for kingianic acid C ( <b>3</b> ) in CDCl <sub>3</sub>                                                                            | S9–S10  |
| HRESIMS for kingianic acid D ( <b>4</b> )                                                                                                     | S11     |
| NMR spectra for kingianic acid D ( <b>4</b> ) in CDCl <sub>3</sub>                                                                            | S11–S12 |
| HRESIMS for kingianic acid E ( <b>5</b> )                                                                                                     | S13     |
| NMR spectra for kingianic acid E ( <b>5</b> ) in CDCl <sub>3</sub>                                                                            | S13–S14 |
| HRESIMS for kingianic acid F ( <b>6</b> )                                                                                                     | S15     |
| NMR spectra for kingianic acid F ( <b>6</b> ) in CDCl <sub>3</sub>                                                                            | S15–S16 |
| HRESIMS for kingianic acid G ( <b>7</b> )                                                                                                     | S17     |
| NMR spectra for kingianic acid G ( <b>7</b> ) in CDCl <sub>3</sub>                                                                            | S17–S18 |
| HRESIMS for endiandric acid M ( <b>8</b> )                                                                                                    | S19     |
| NMR spectra for endiandric acid M ( <b>8</b> ) in CDCl <sub>3</sub>                                                                           | S19–S20 |
| HRESIMS for endiandric acid <b>10</b>                                                                                                         | S21     |
| NMR spectra for endiandric acid <b>10</b> in CDCl <sub>3</sub>                                                                                | S21–S22 |
| Sequences alignment of Bcl-xL and Mcl-1 with Bak-BH3 and Bid-BH3 peptides respectively                                                        | S23     |

---

**Figure S1.** Structures of kingianic acids A-G (1–7), endiandric acid M (8), tsangibeilin B (9) and endiandric acid 10.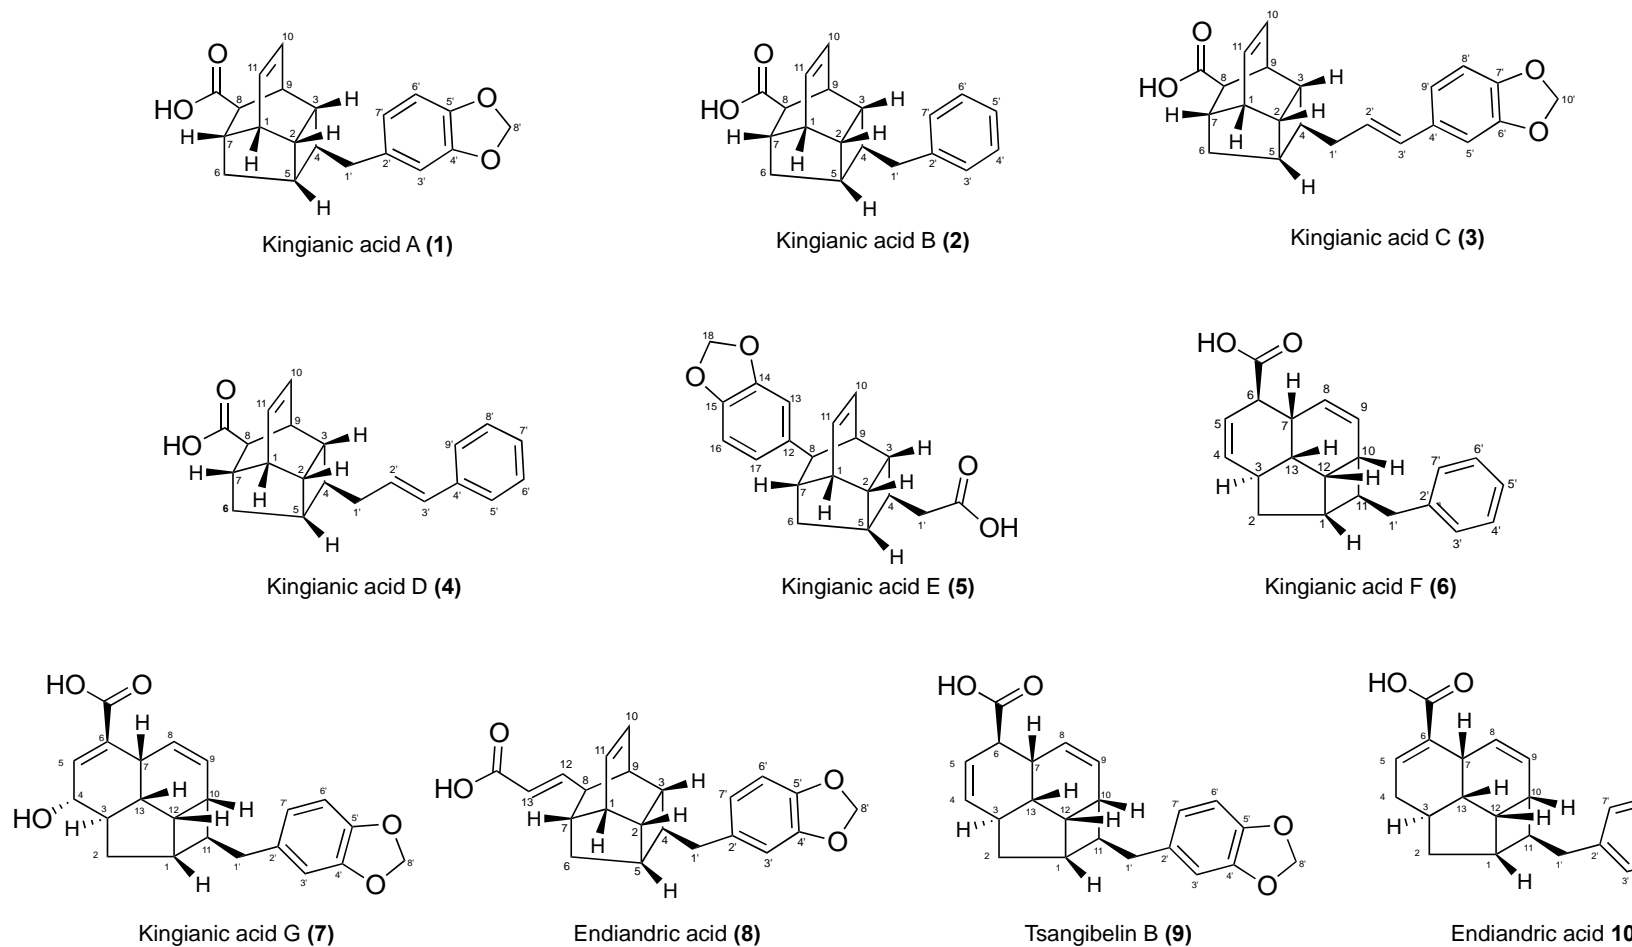

**Figure S2.** X-ray crystallographic analysis of endiandric acid **10**: A colourless crystal was obtained from MeOH, crystallized in the monoclinic crystal system with P21/c space group. Cell parameters:  $a = 7.9900(2) \text{ \AA}$ ;  $b = 21.9056(6) \text{ \AA}$ ;  $c = 10.8257(3) \text{ \AA}$ ;  $V = 1834.58(8) \text{ \AA}^3$ ,  $T$  100 K. In the crystal structure, two molecules are linked by hydrogen bonds across a centre of inversion (**A**) and adjacent pairs are further linked by the double CH- $\pi$  interactions that occur between the phenyl and the dioxole ring (**B**). The overall crystal packing gives rise to a 2-D layered structure as shown in **C**. Supplementary crystallographic data have been deposited at the CCDC; CCDC 918161. ORTEP plot of endiandric acid **10** with the displacement ellipsoids drawn at the 50% probability level.

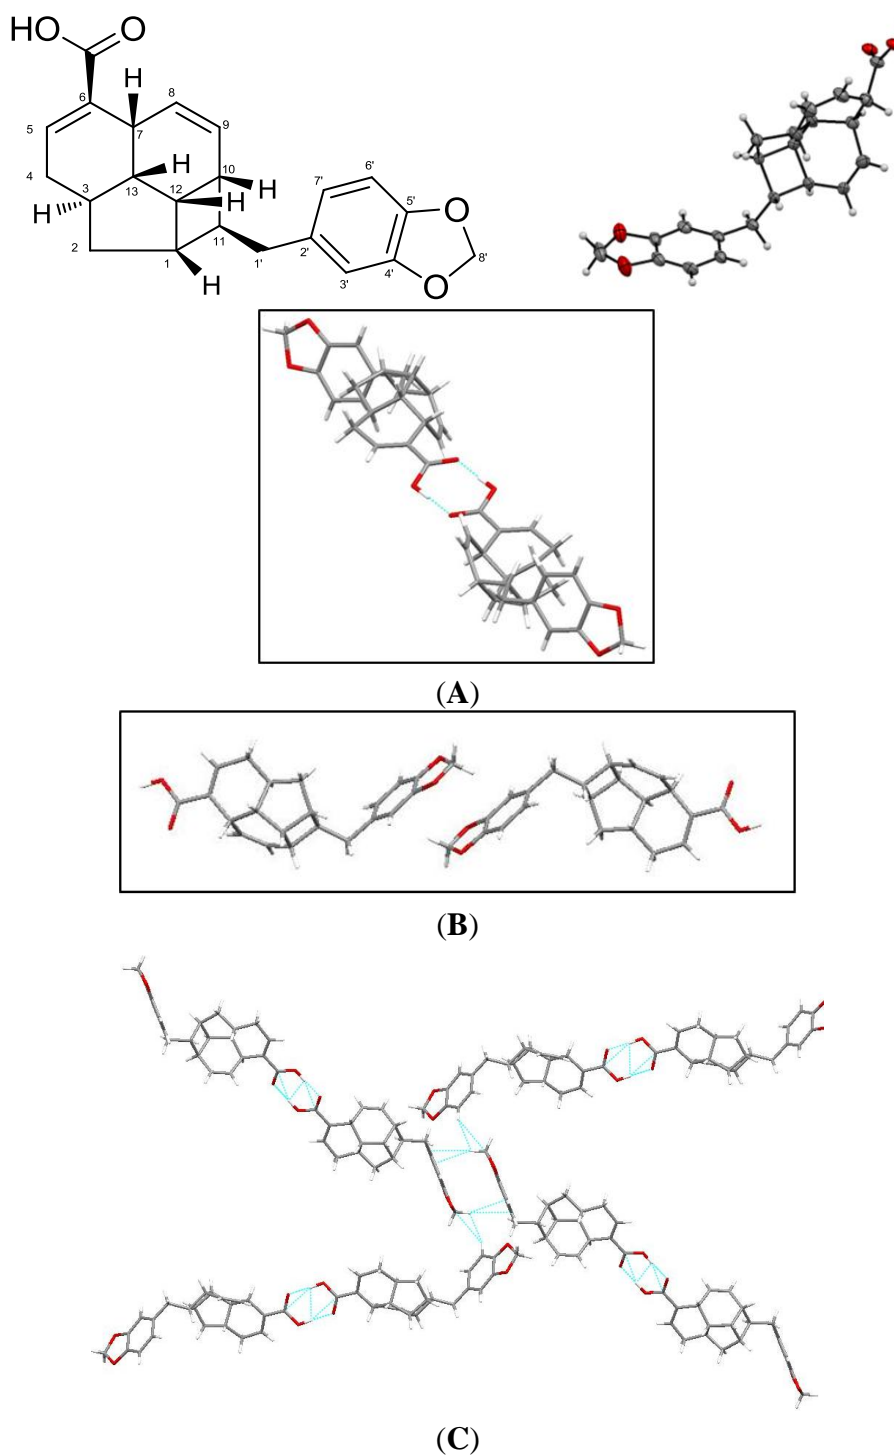

**Figure S3.** X-Ray Crystallographic Data of *tsangibeilin B* (**9**). A colorless crystal was obtained from MeOH, crystallized in the monoclinic crystal system with C2/c space group. Cell parameters:  $a = 41.694(9) \text{ \AA}$ ;  $b = 6.8688(15) \text{ \AA}$ ;  $c = 12.282(3) \text{ \AA}$ ;  $\beta = 101.742(4)^\circ$ ;  $V = 1834.58(8) \text{ \AA}^3$ , ,  $T 100 \text{ K}$ .

ORTEP plot of *tsangibeilin B* (**9**) with the displacement ellipsoids drawn at the 50% probability level.

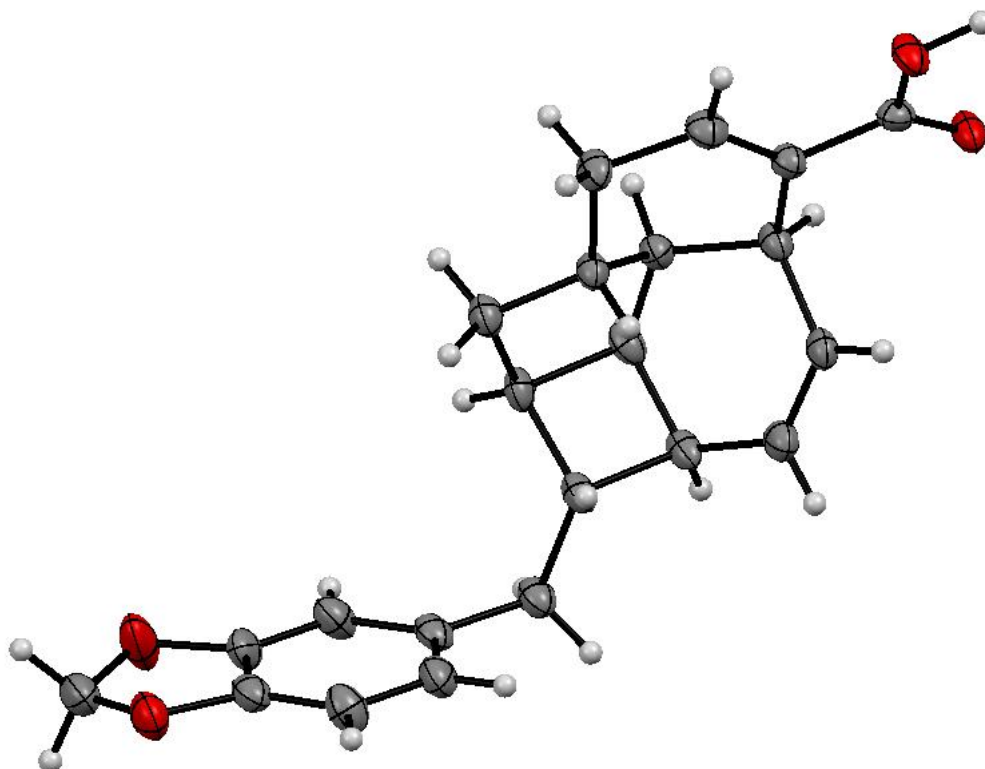

Figure S4. HRESIMS of kingianic acid A (1).

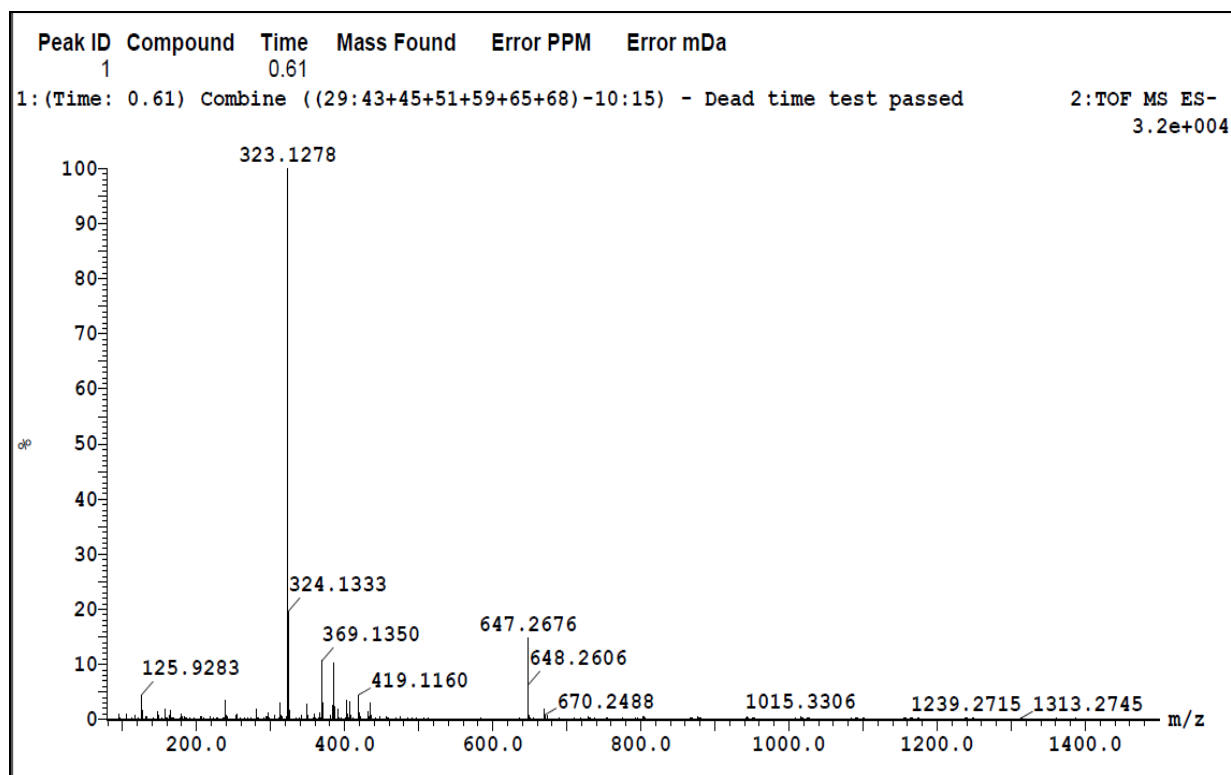Figure S5.  $^1\text{H-NMR}$  kingianic acid A (1) in  $\text{CDCl}_3$  at 600 MHz.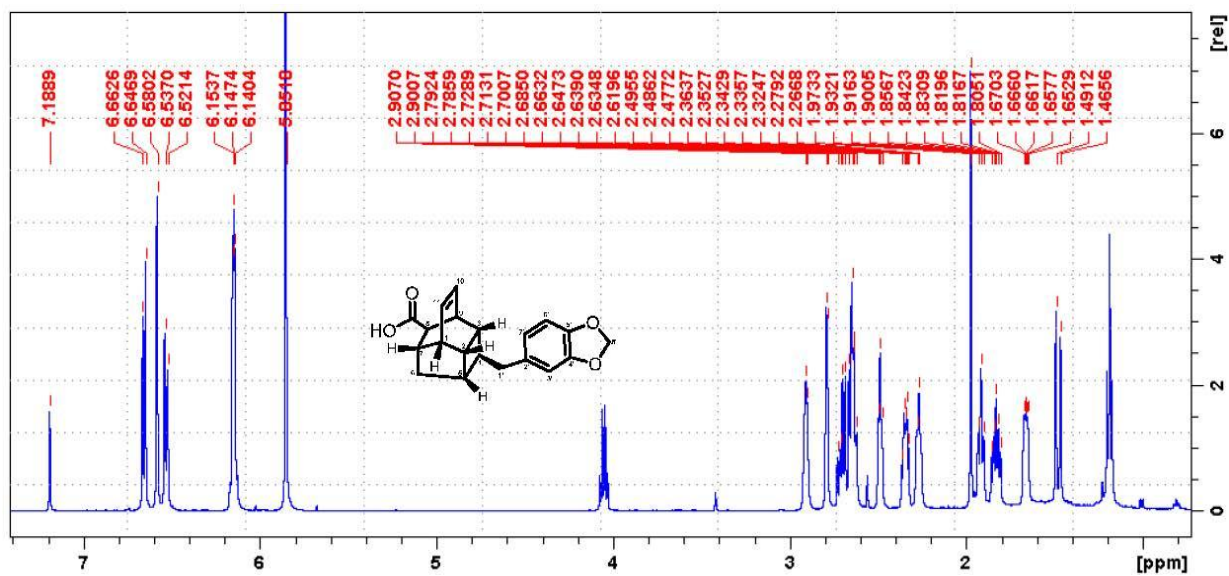

Figure S6.  $^{13}\text{C}$ -NMR kingianic acid A (1) in  $\text{CDCl}_3$  at 150 MHz.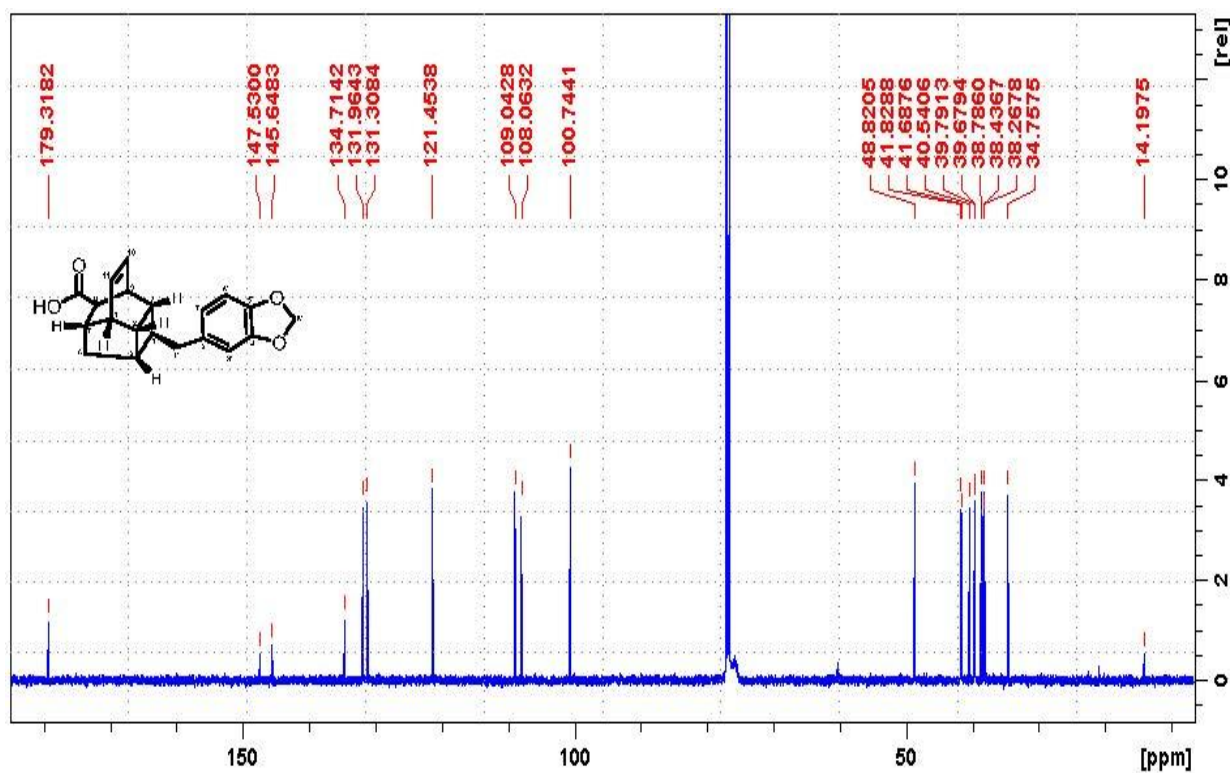Figure S7. DEPT135 kingianic acid A (1) in  $\text{CDCl}_3$ .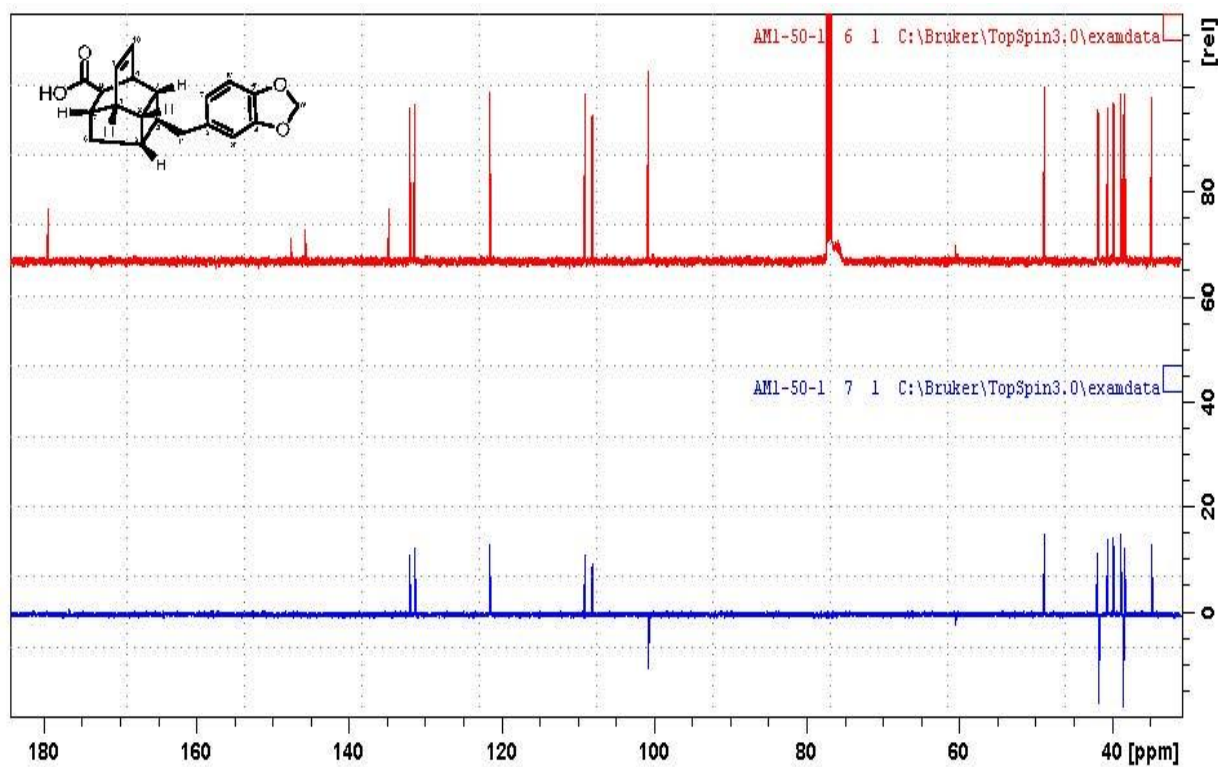

Figure S8. HRESIMS of kingianic acid B (2).

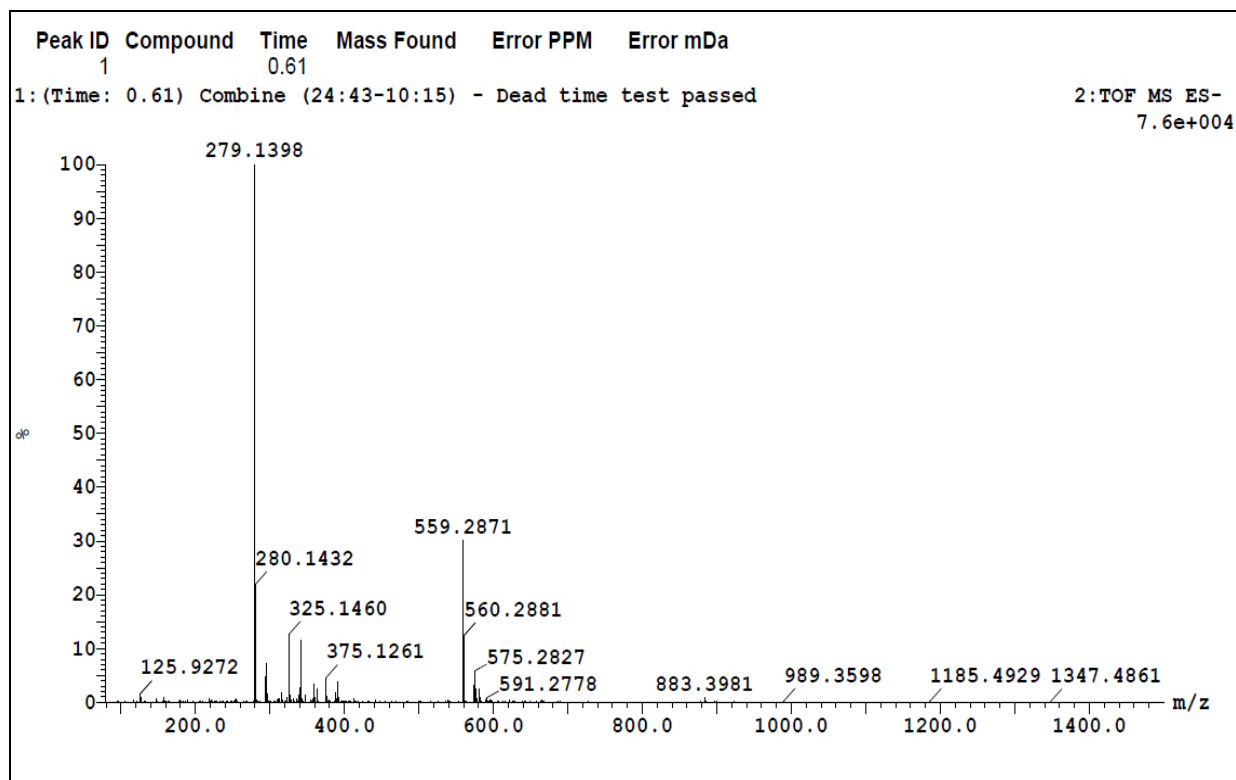Figure S9.  $^1\text{H-NMR}$  kingianic acid B (2) in  $\text{CDCl}_3$  at 600 MHz.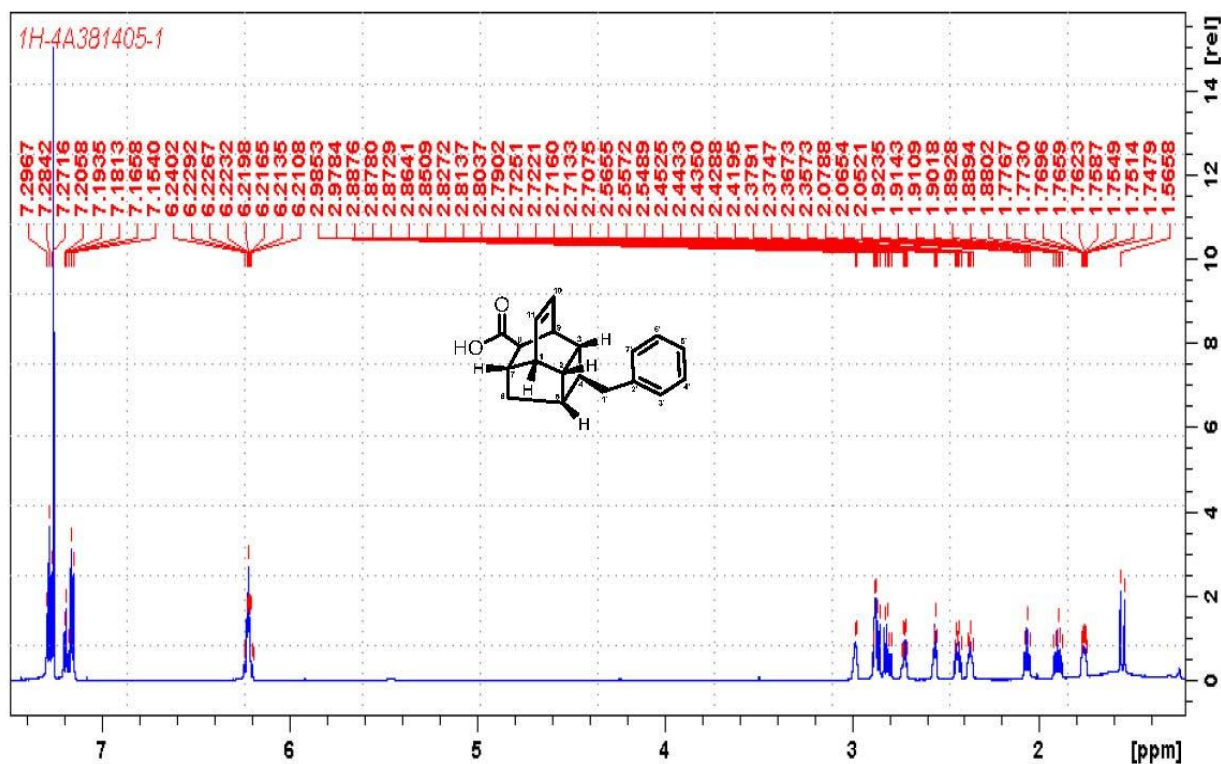



Figure S10.  $^{13}\text{C}$ -NMR kingianic acid B (2) in  $\text{CDCl}_3$  at 150 MHz.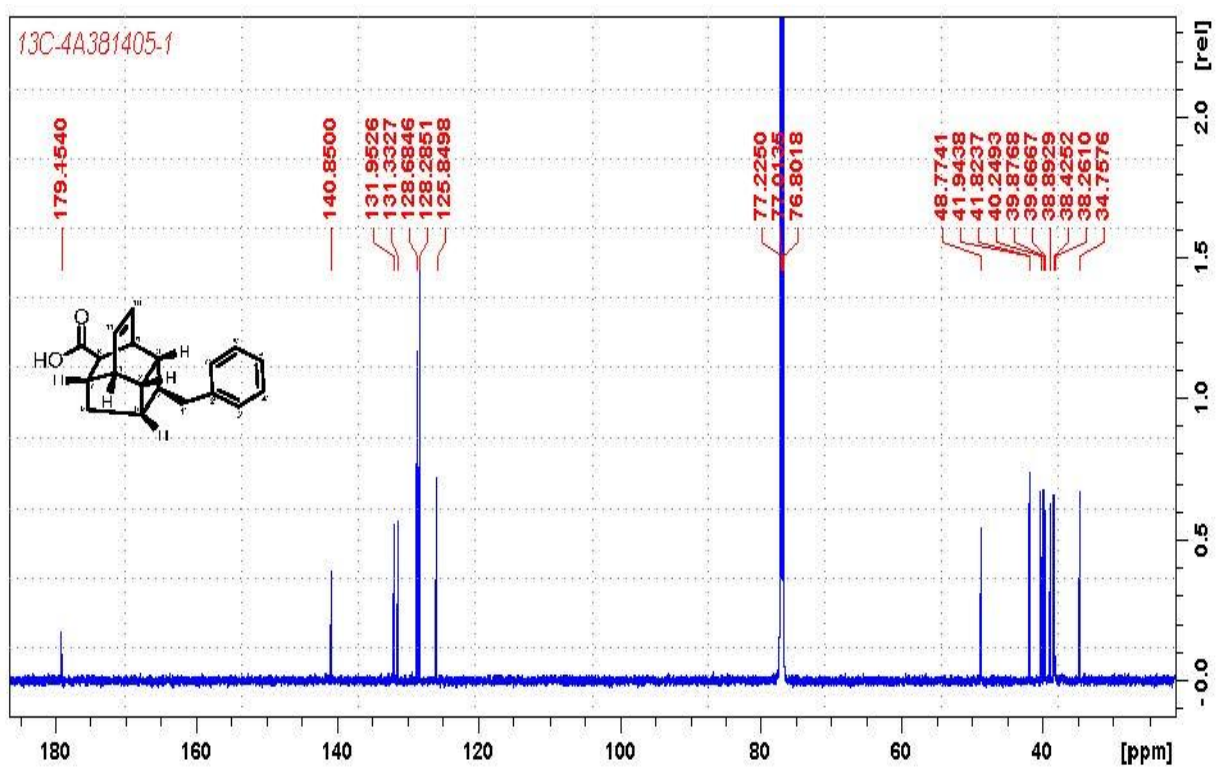Figure S11. DEPT135 kingianic acid B (2) in  $\text{CDCl}_3$ .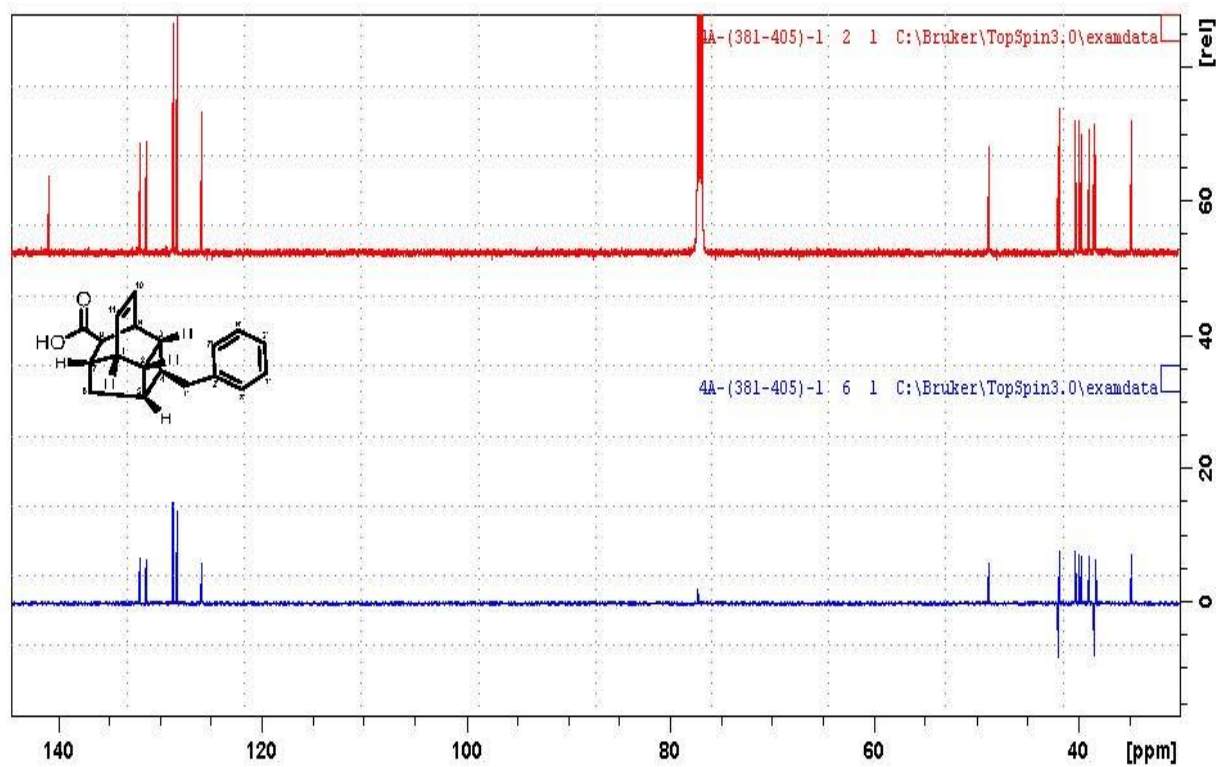



Figure S12. HRESIMS of kingianic acid C (3).

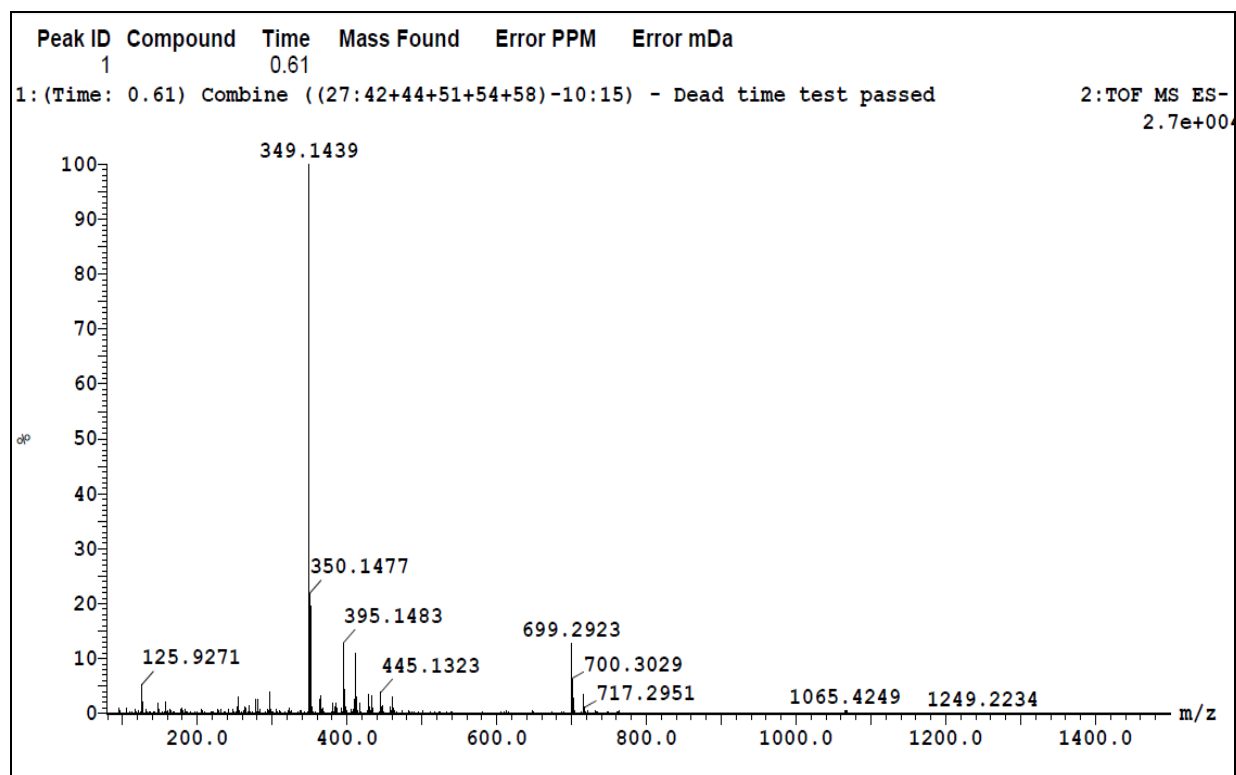Figure S13.  $^1\text{H-NMR}$  kingianic acid C (3) in  $\text{CDCl}_3$  at 600 MHz.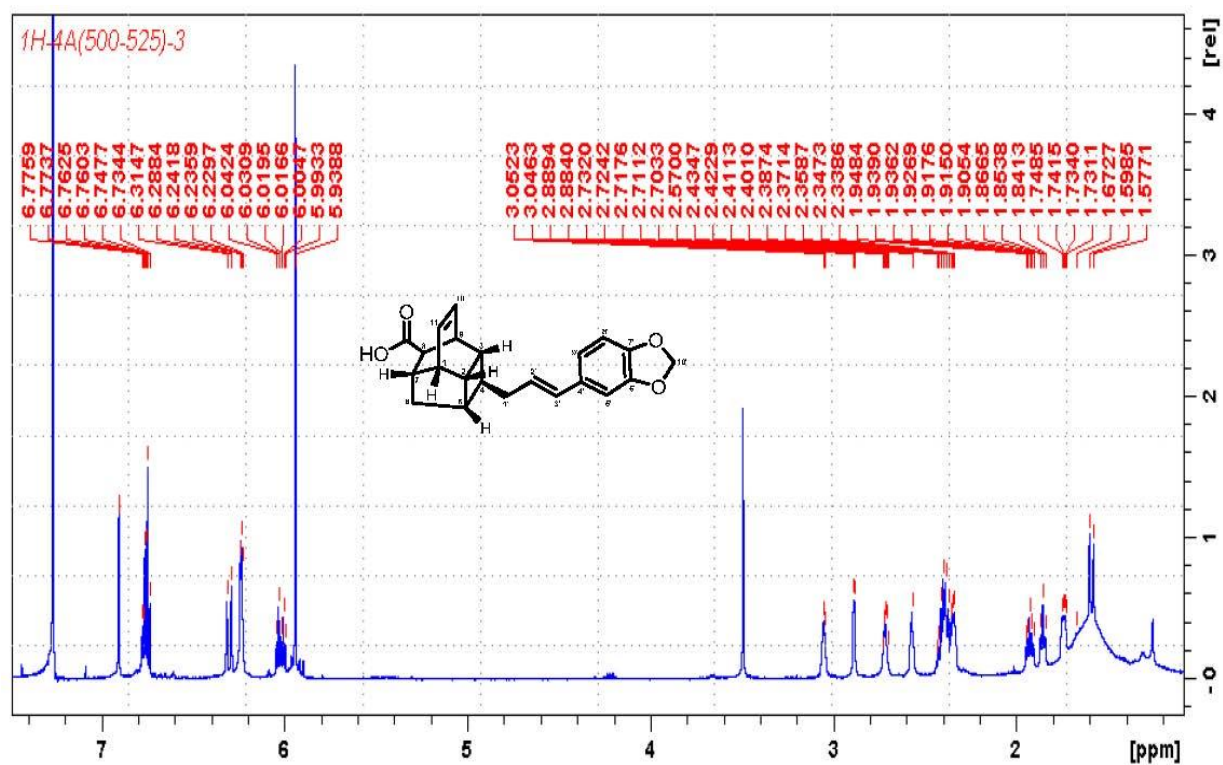

**Figure S14.**  $^{13}\text{C}$ -NMR kingianic acid C (**3**) in  $\text{CDCl}_3$  at 150 MHz.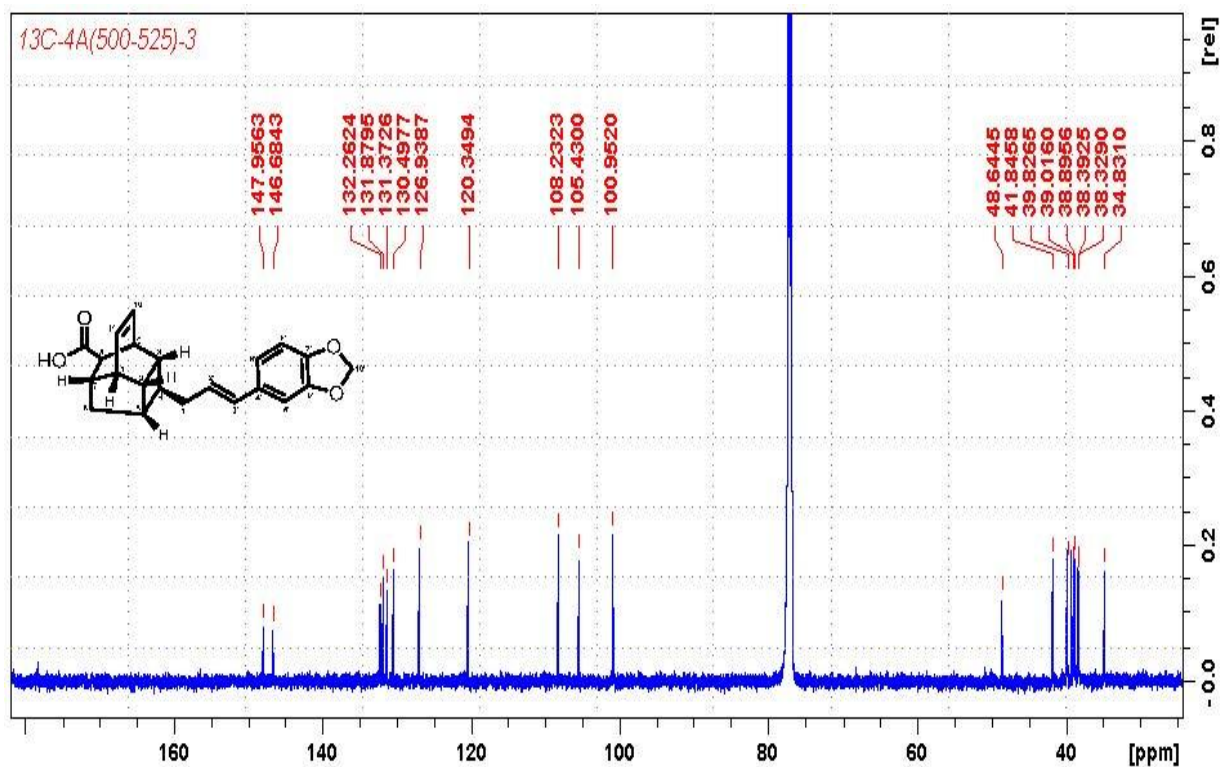**Figure S15.** DEPT135 kingianic acid C (**3**) in  $\text{CDCl}_3$ .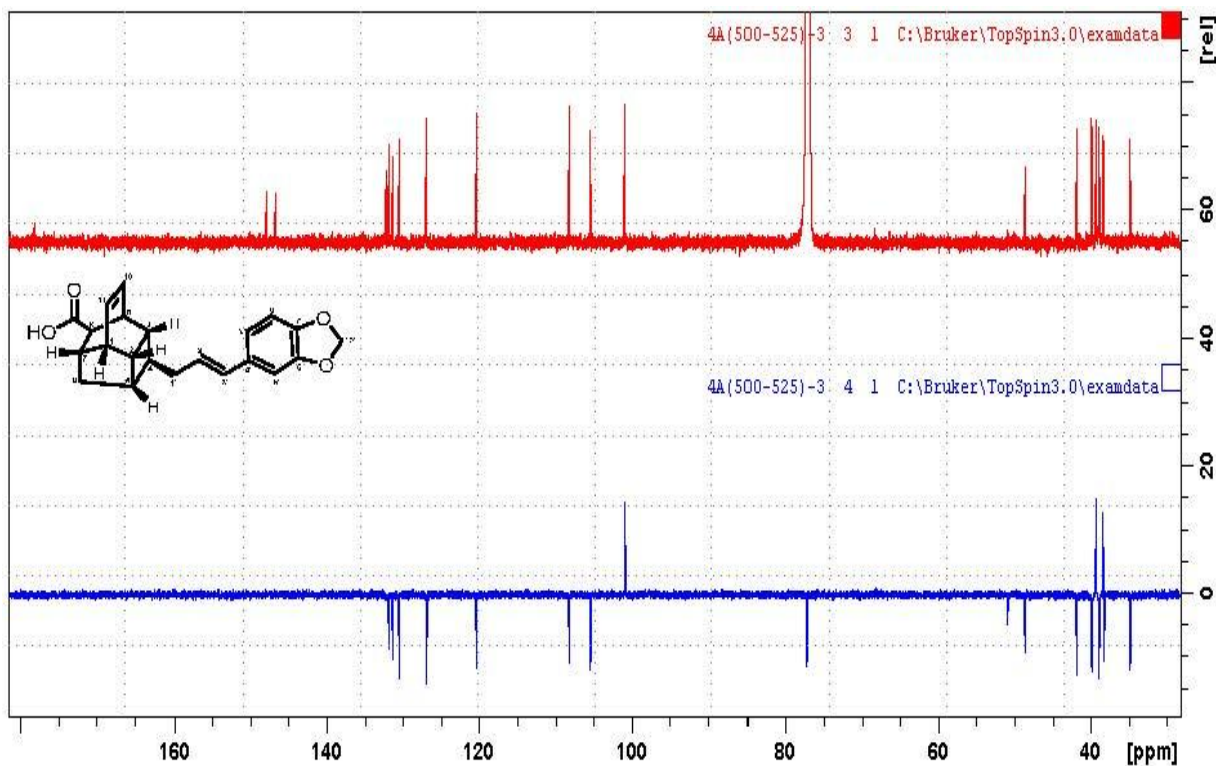

Figure S16. HRESIMS of kingianic acid D (4).

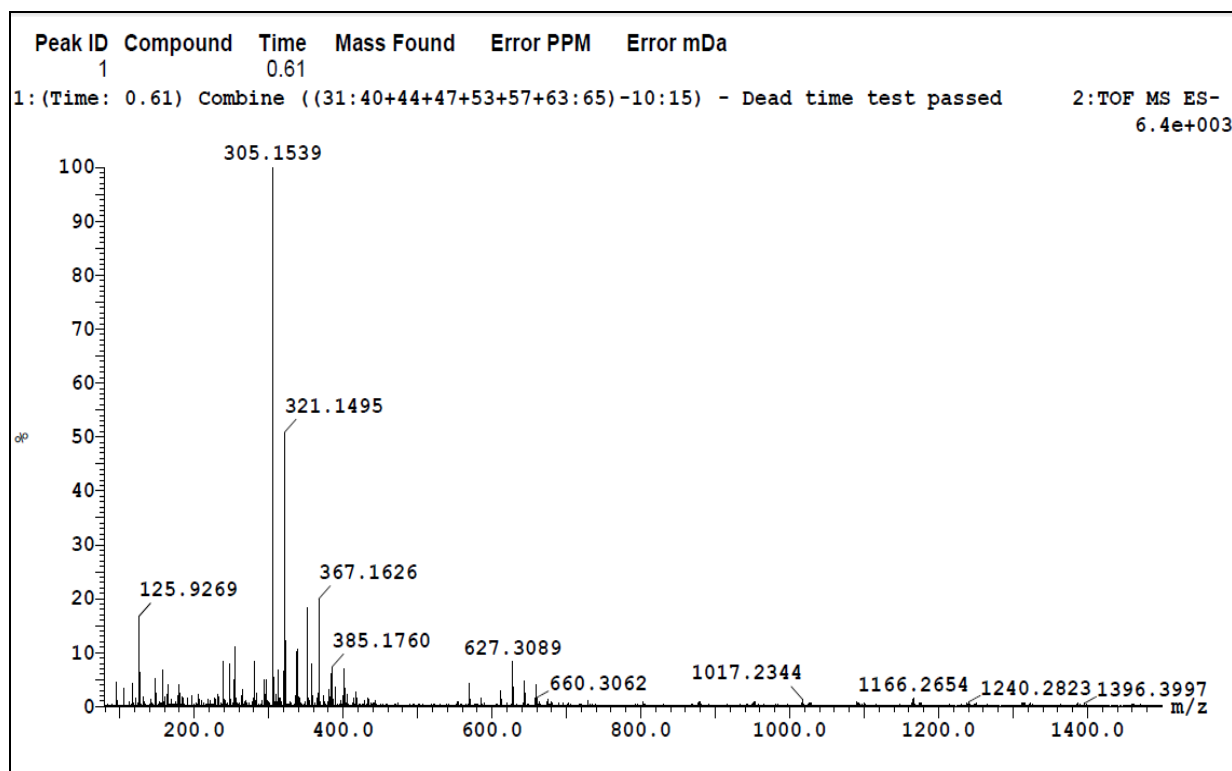Figure S17.  $^1\text{H-NMR}$  kingianic acid D (4) in  $\text{CDCl}_3$  at 600 MHz.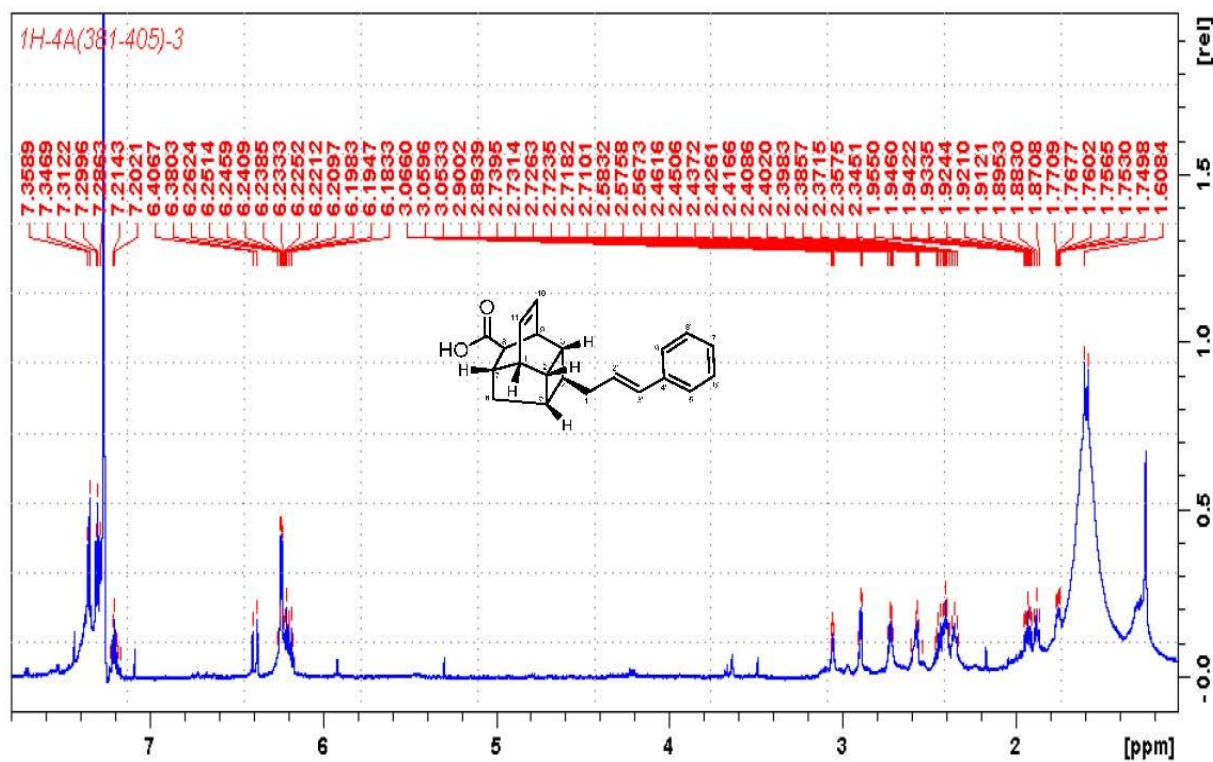



Figure S18.  $^{13}\text{C}$ -NMR kingianic acid D (4) in  $\text{CDCl}_3$  at 150 MHz.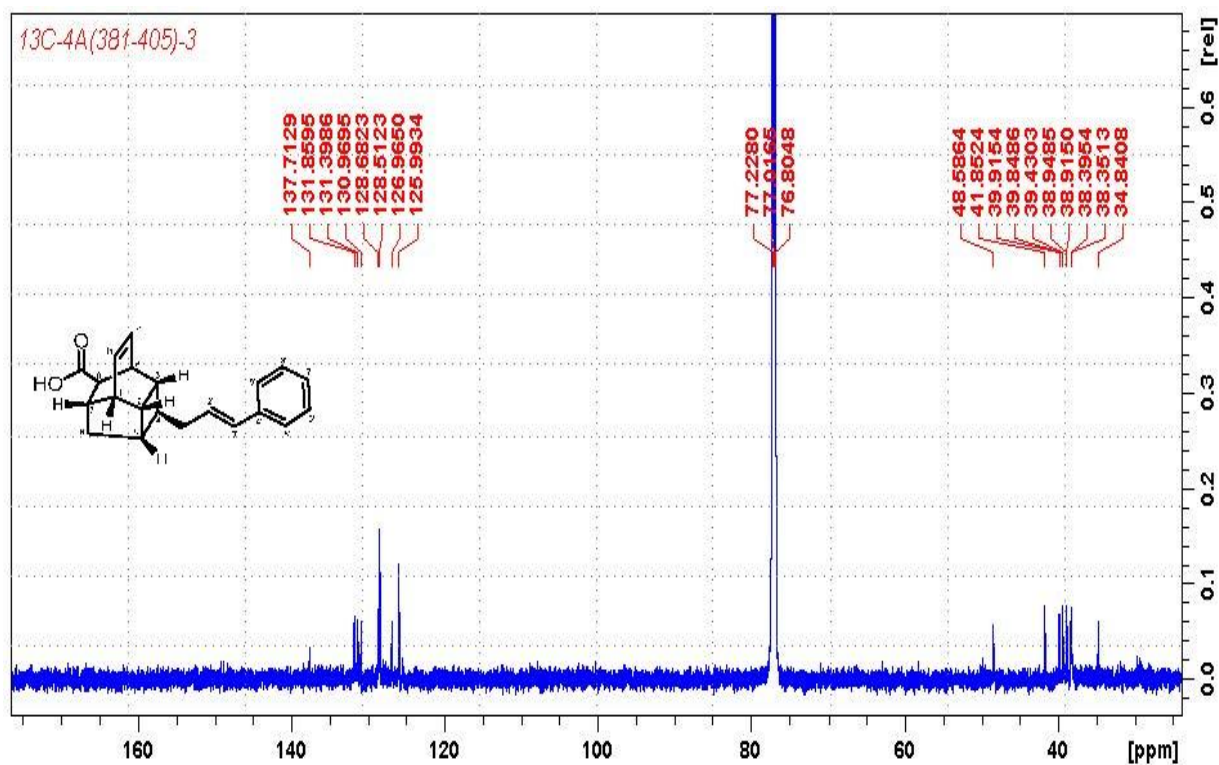Figure S19. DEPT135 kingianic acid D (4) in  $\text{CDCl}_3$ .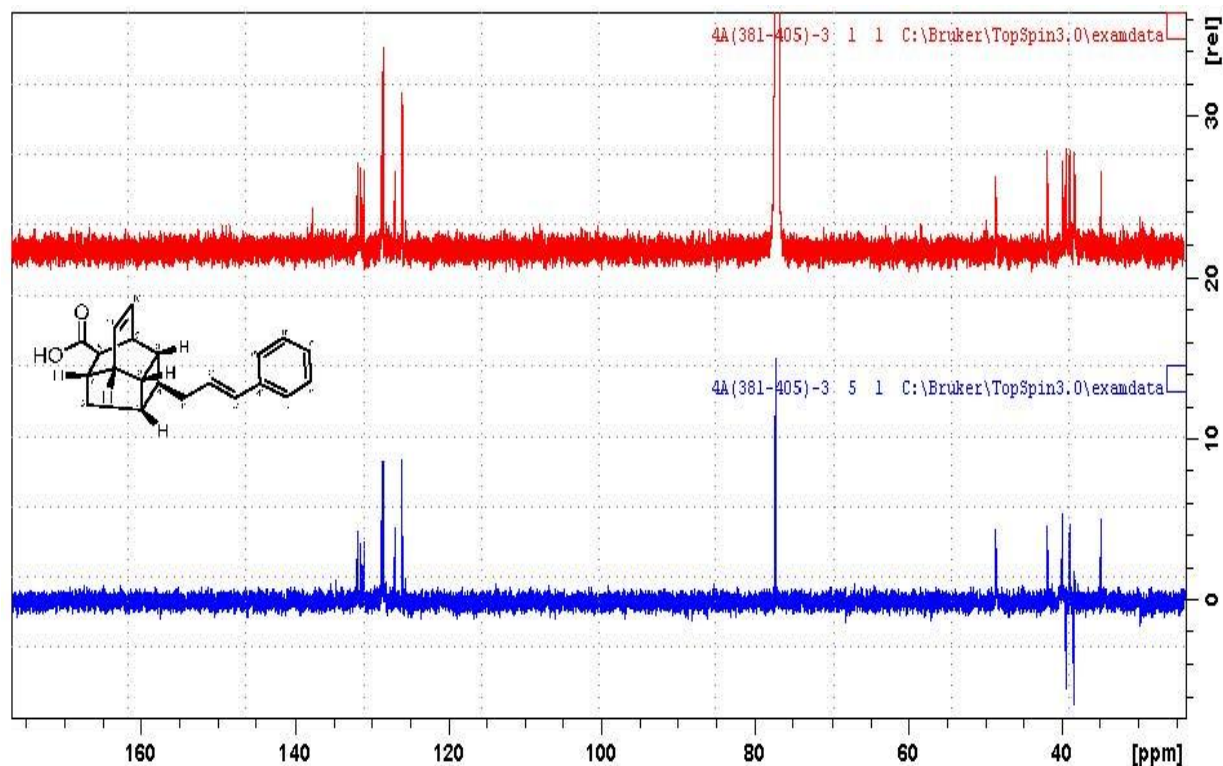

Figure S20. HRESIMS of kingianic acid E (5).

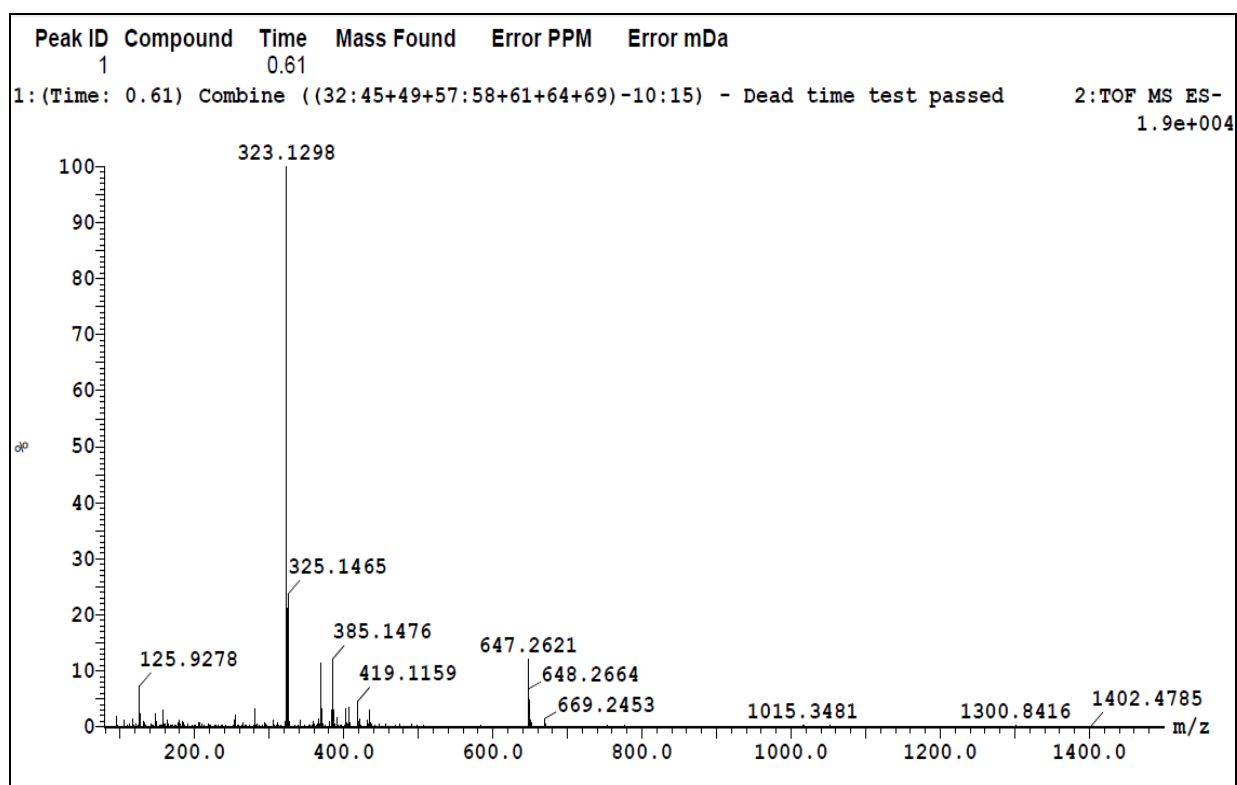Figure S21. <sup>1</sup>H-NMR kingianic acid E (5) in CDCl<sub>3</sub> at 600 MHz.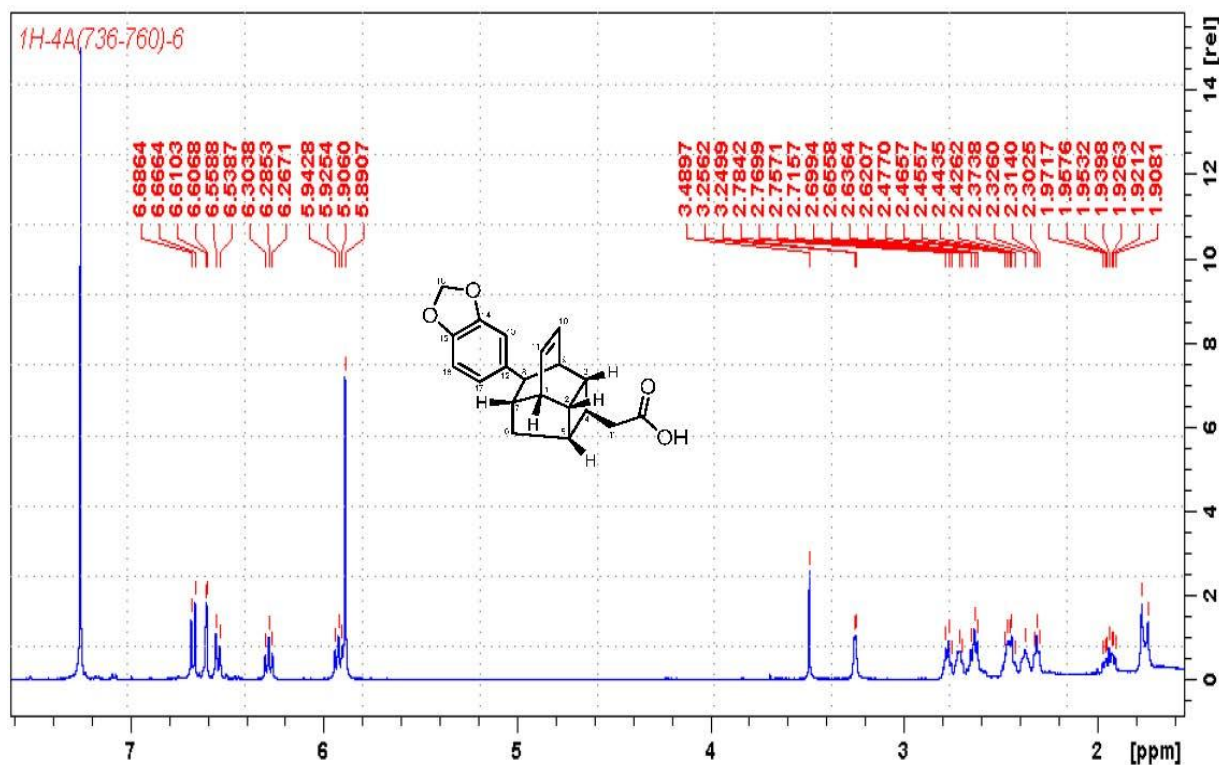

Figure S22.  $^{13}\text{C}$ -NMR kingianic acid E (5) in  $\text{CDCl}_3$  at 150 MHz.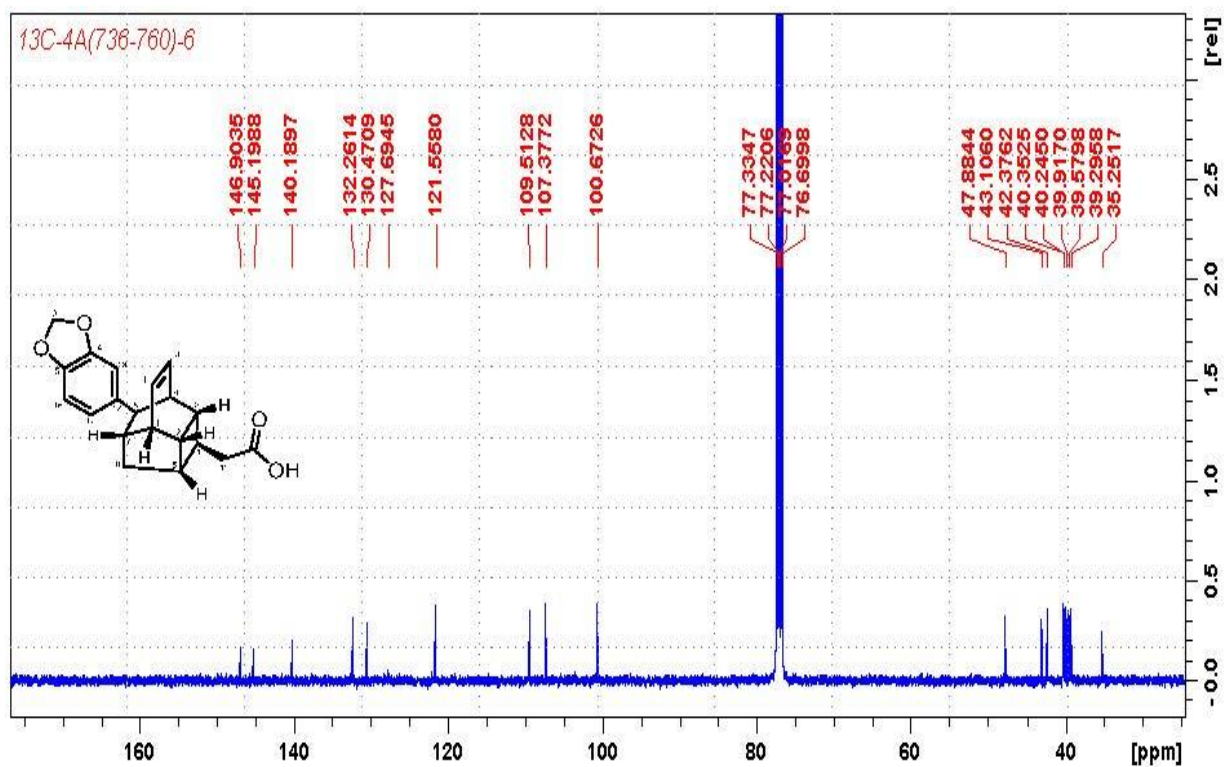Figure S23. DEPT135 kingianic acid E (5) in  $\text{CDCl}_3$ .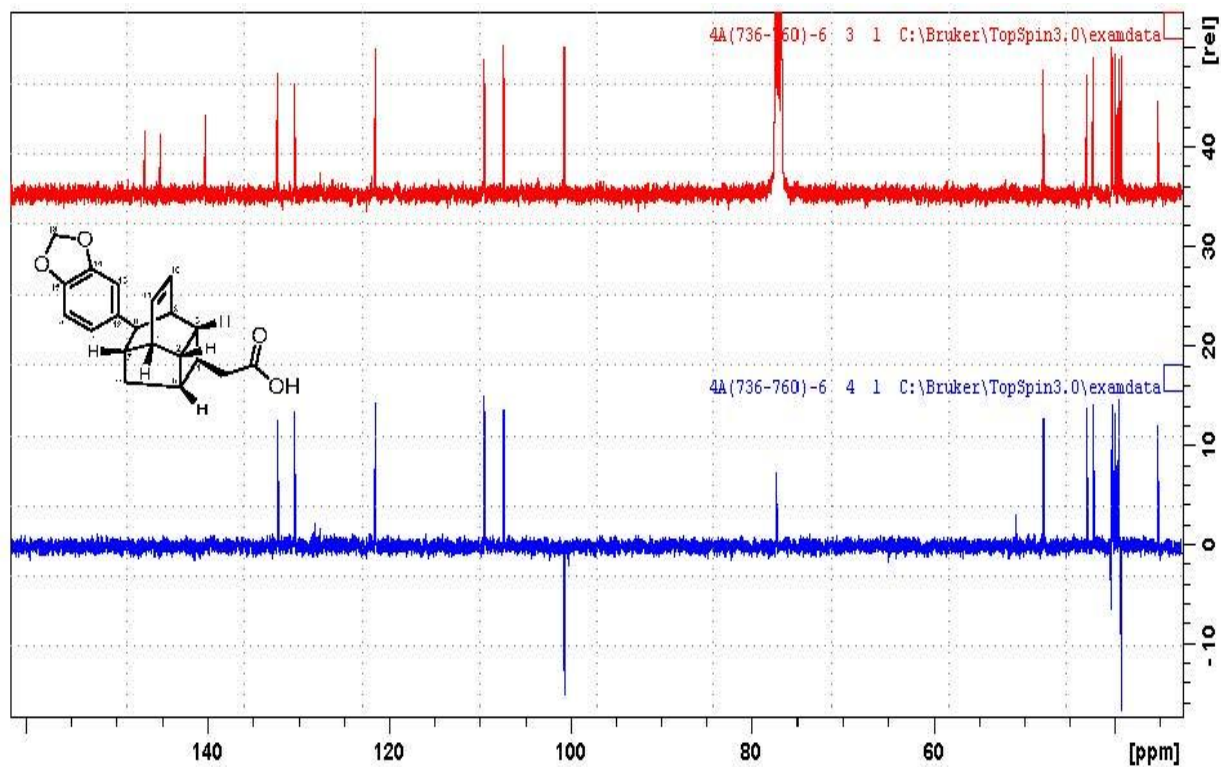



Figure S24. HRESIMS of kingianic acid F (6).

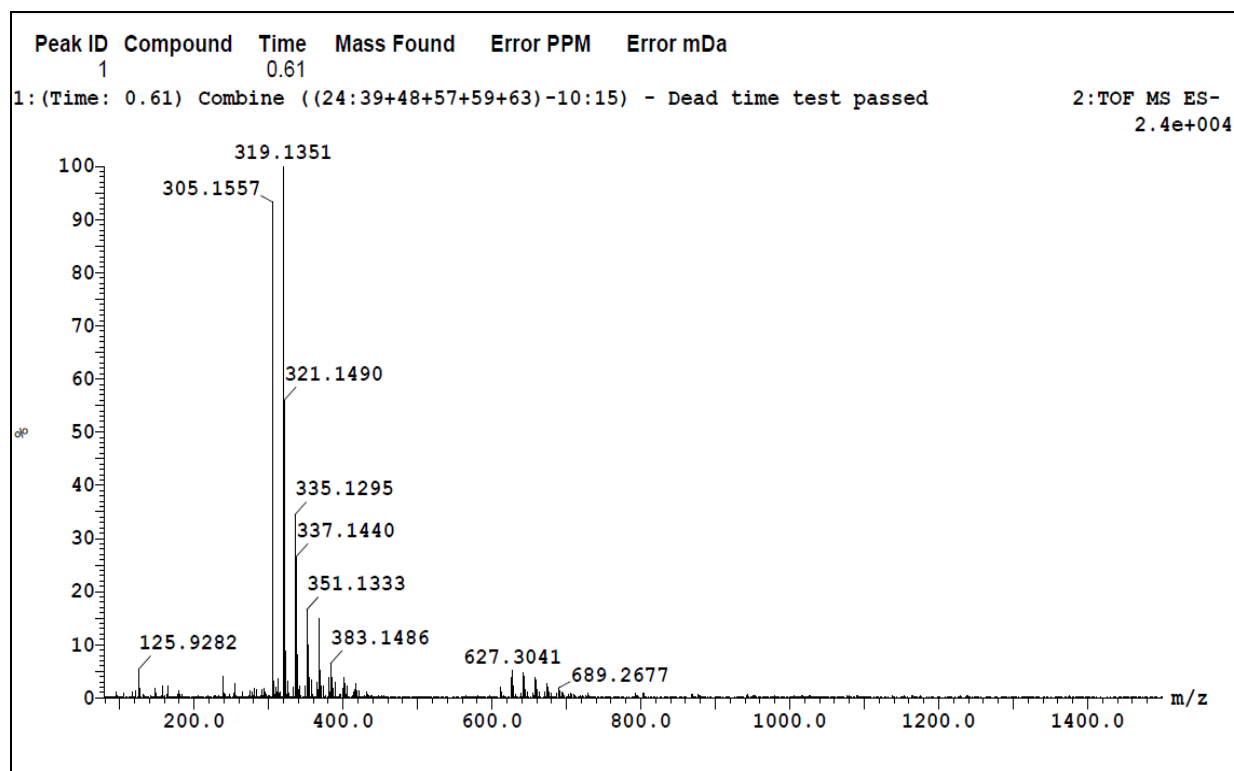Figure S25.  $^1\text{H-NMR}$  kingianic acid F (6) in  $\text{CDCl}_3$  at 600 MHz.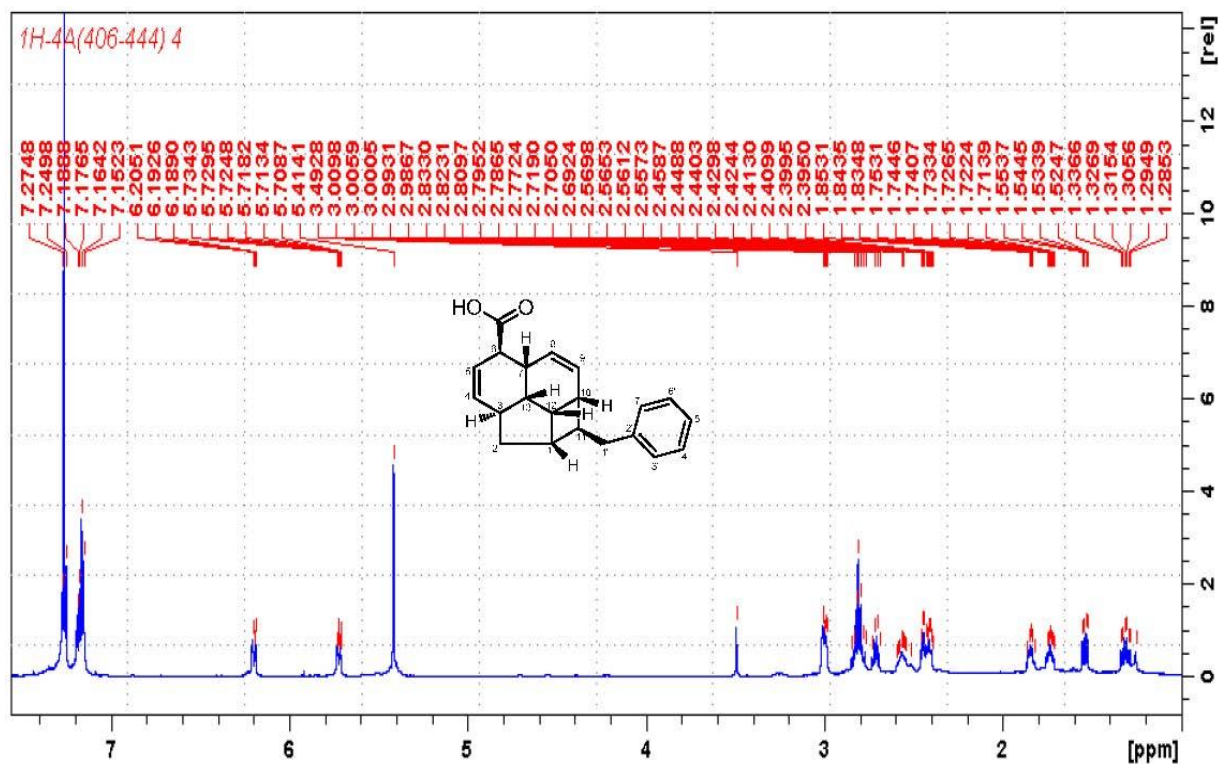

Figure S26.  $^{13}\text{C}$ -NMR kingianic acid F (6) in  $\text{CDCl}_3$  at 150 MHz.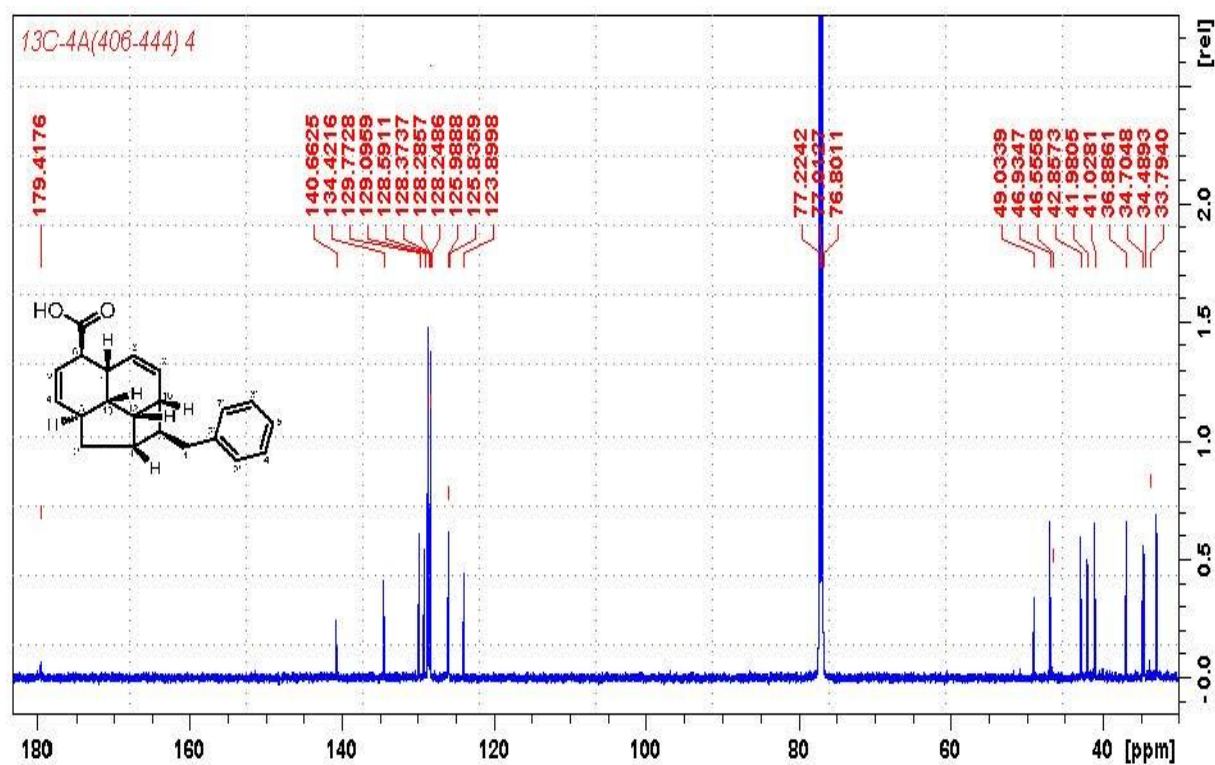Figure S27. DEPT135 kingianic acid F (6) in  $\text{CDCl}_3$ .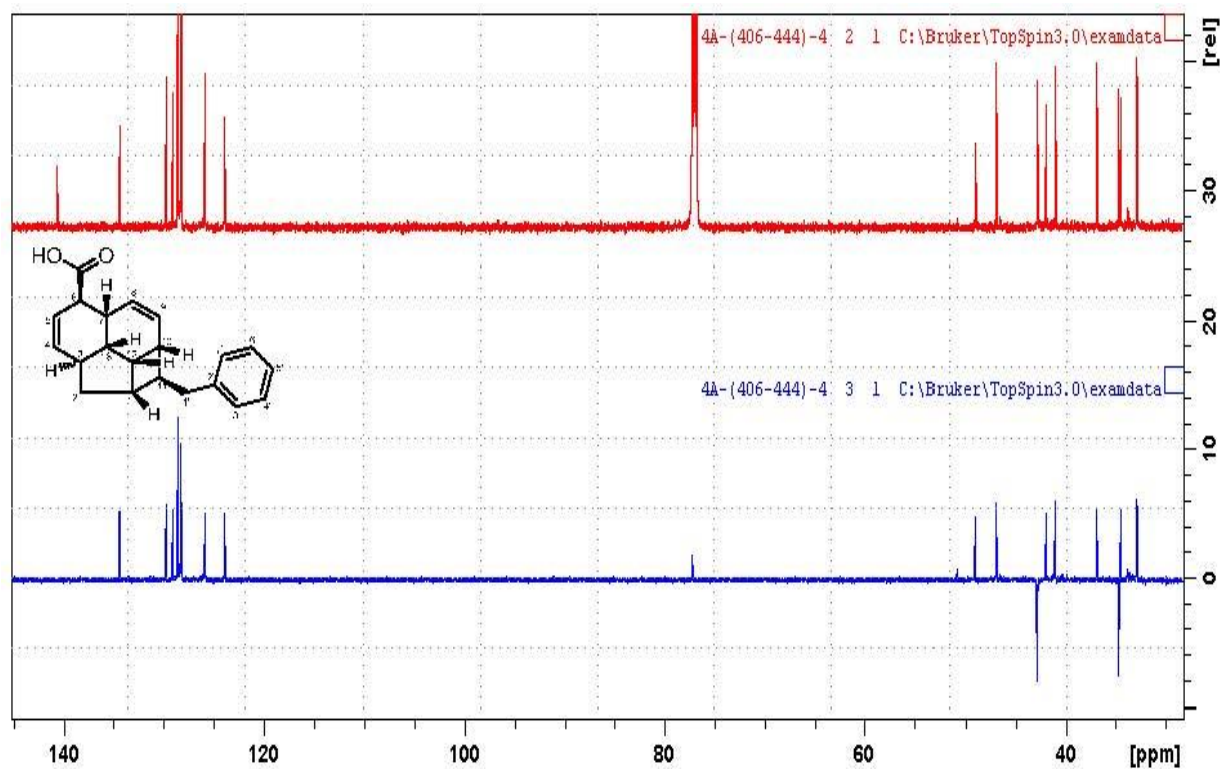

Figure S28. HRESIMS of kingianic acid G (7).

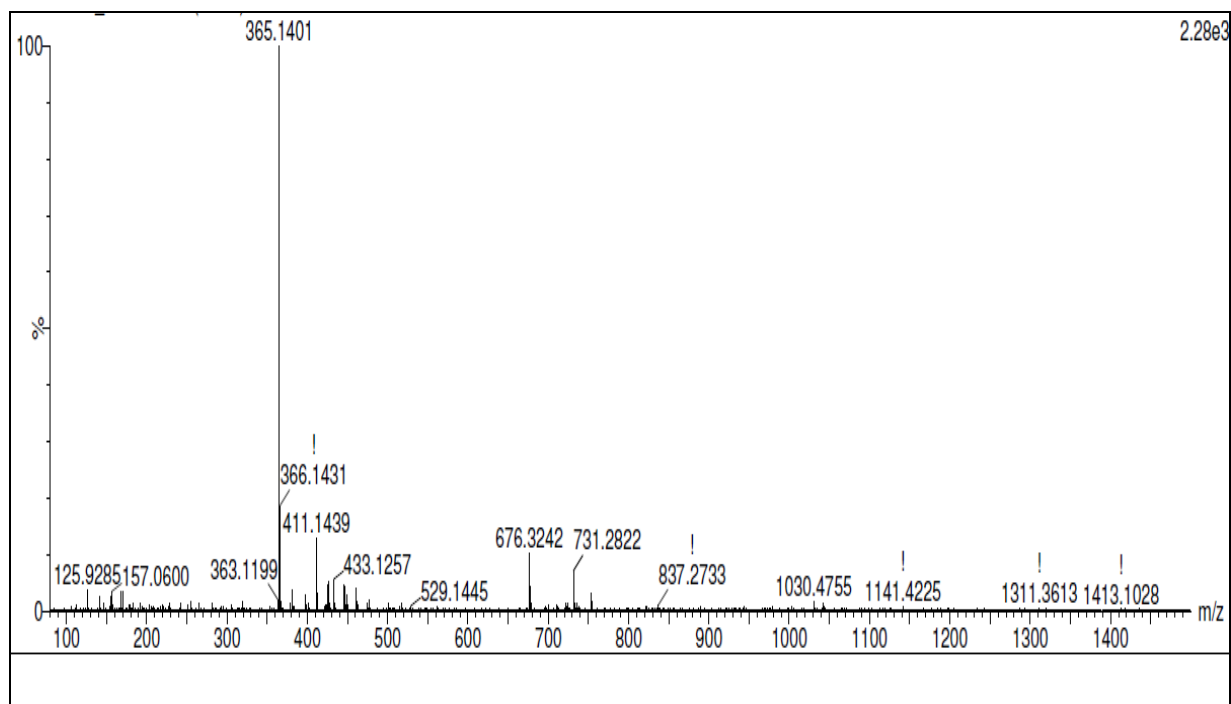Figure S29.  $^1\text{H-NMR}$  kingianic acid G (7) in  $\text{CDCl}_3$  at 600 MHz.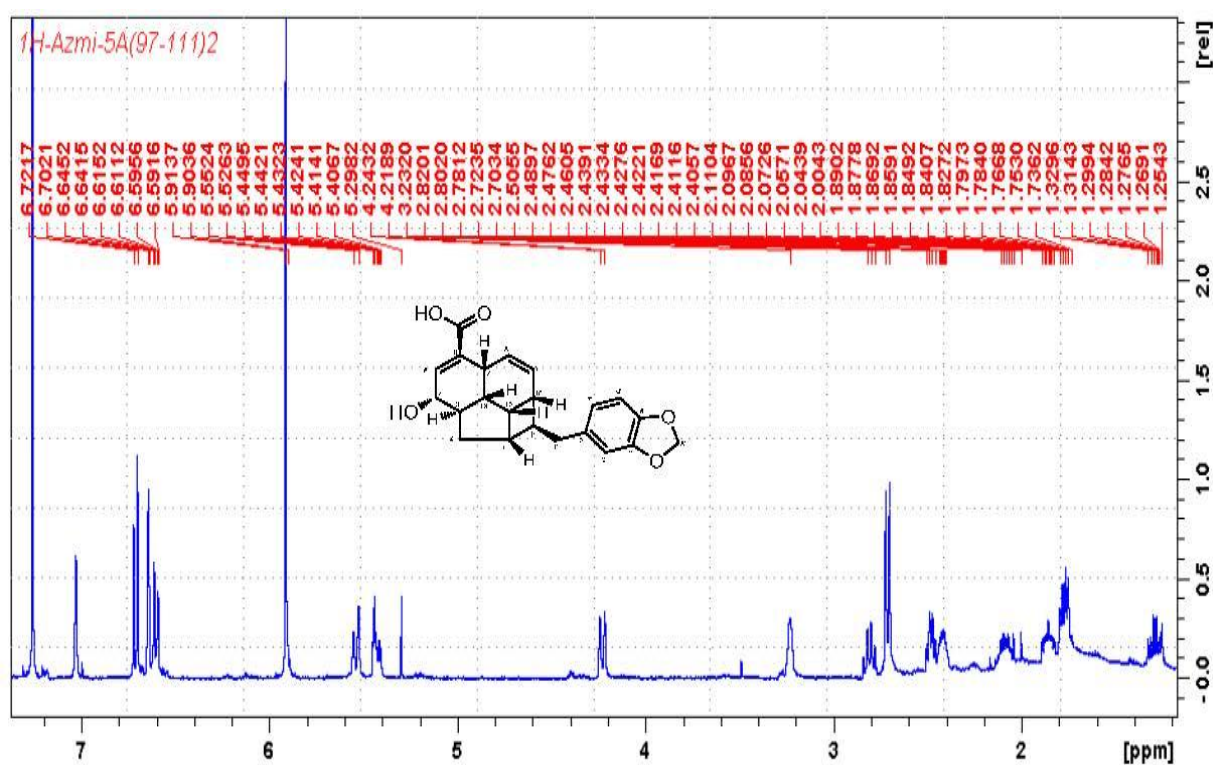

Figure S30.  $^{13}\text{C}$ -NMR kingianic acid G (7) in  $\text{CDCl}_3$  at 150 MHz.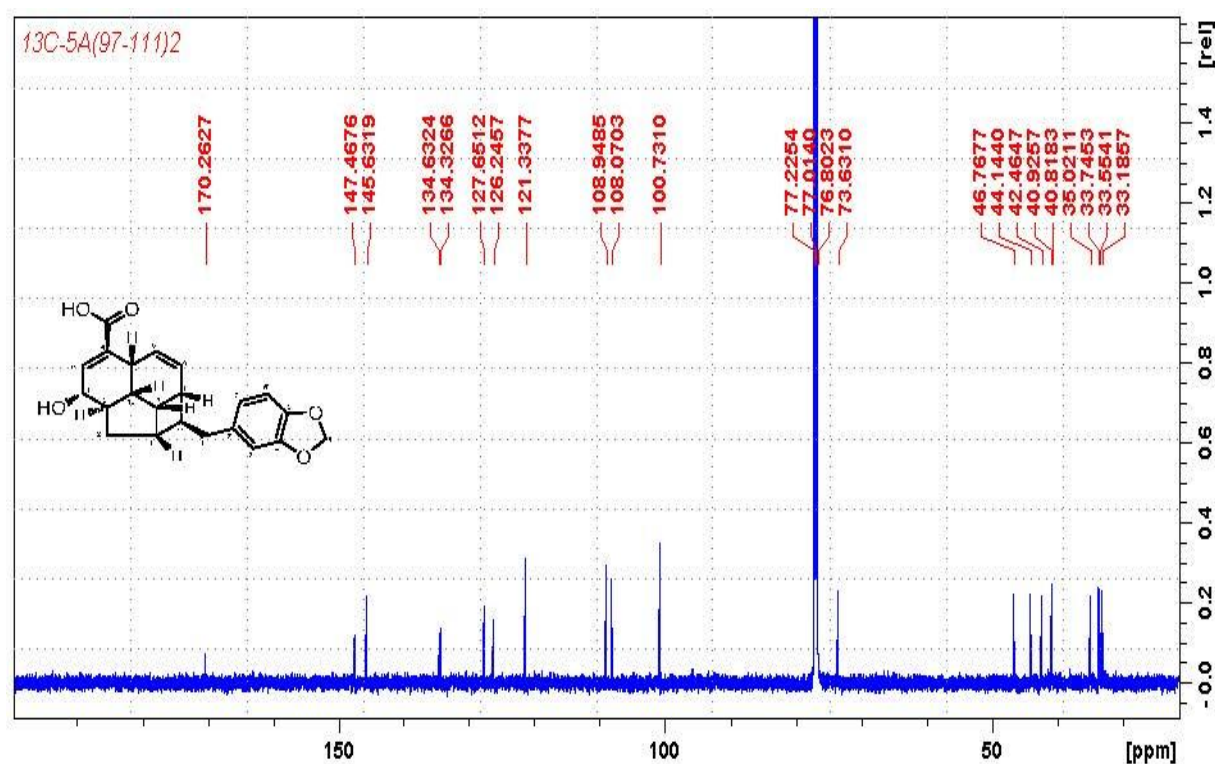Figure S31. DEPT135 kingianic acid G (7) in  $\text{CDCl}_3$ .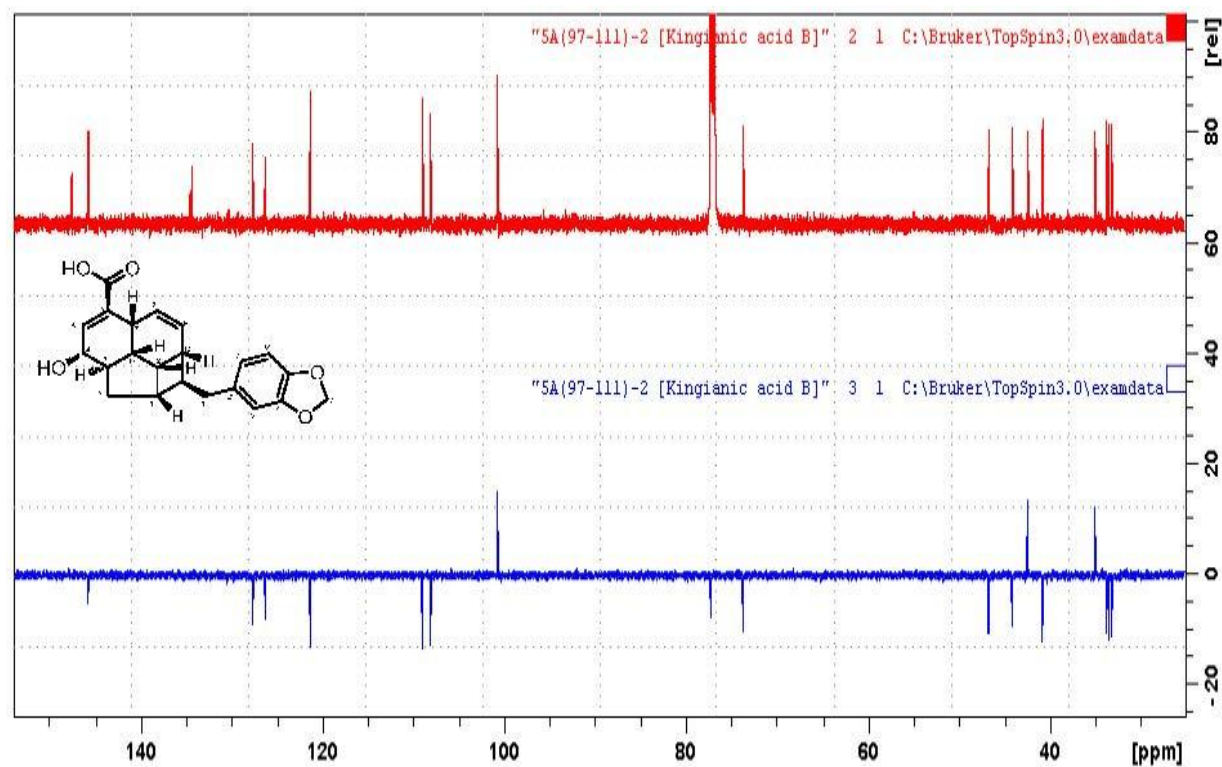



Figure S32. HRESIMS of endiandric acid M (8).

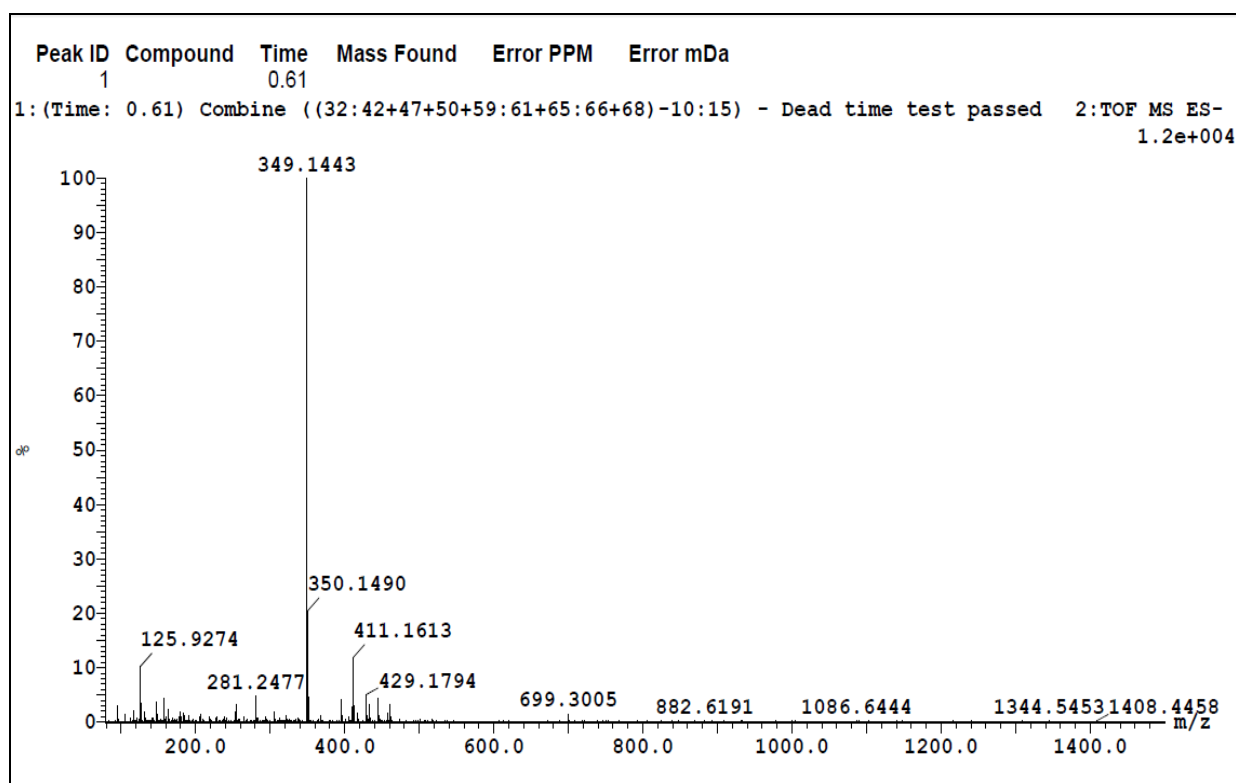Figure S33.  $^1\text{H-NMR}$  endiandric acid M (8) in  $\text{CDCl}_3$  at 600 MHz.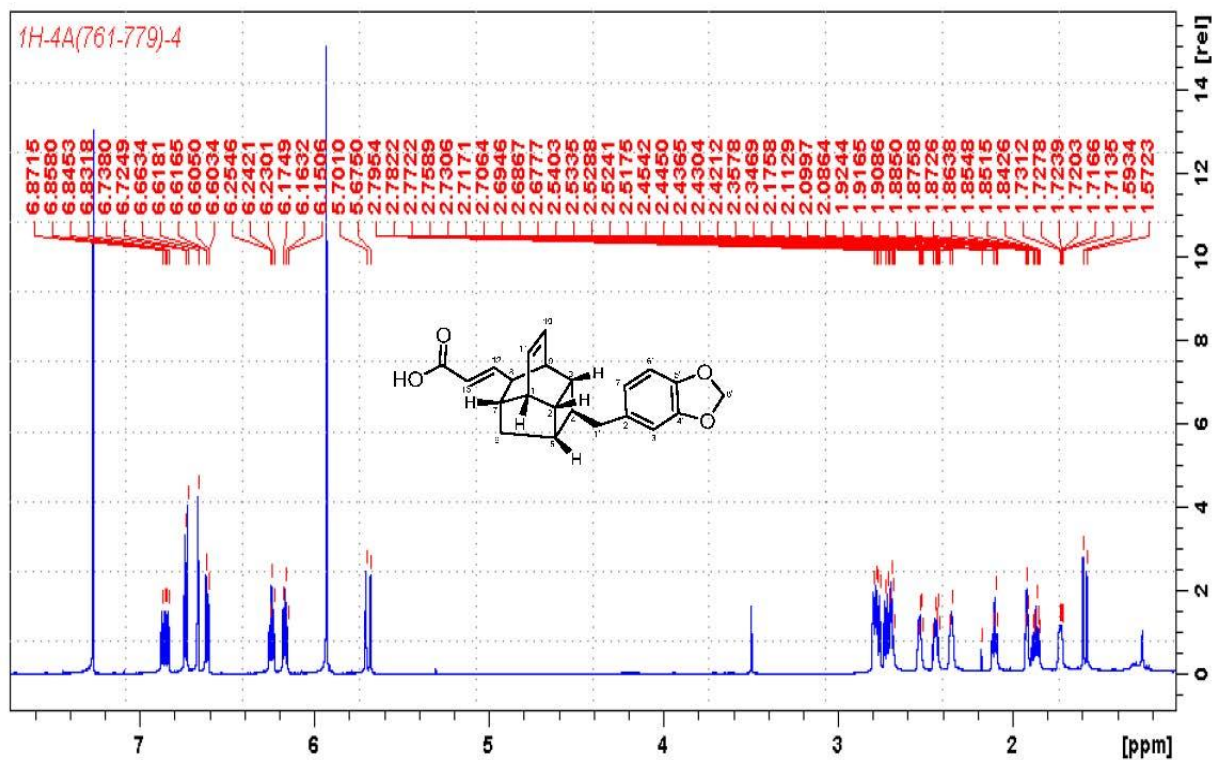

Figure S34.  $^{13}\text{C}$ -NMR endiandric acid M (8) in  $\text{CDCl}_3$  at 150 MHz.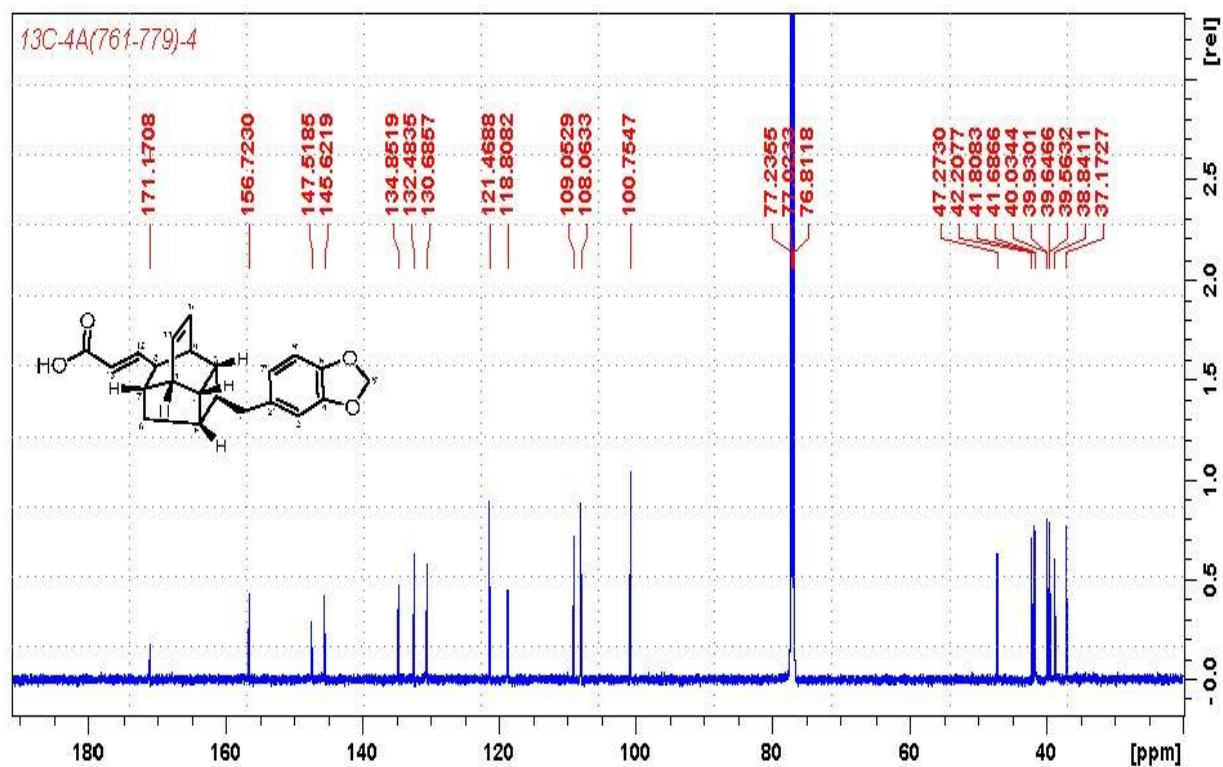Figure S35. DEPT135 endiandric acid M (8) in  $\text{CDCl}_3$ .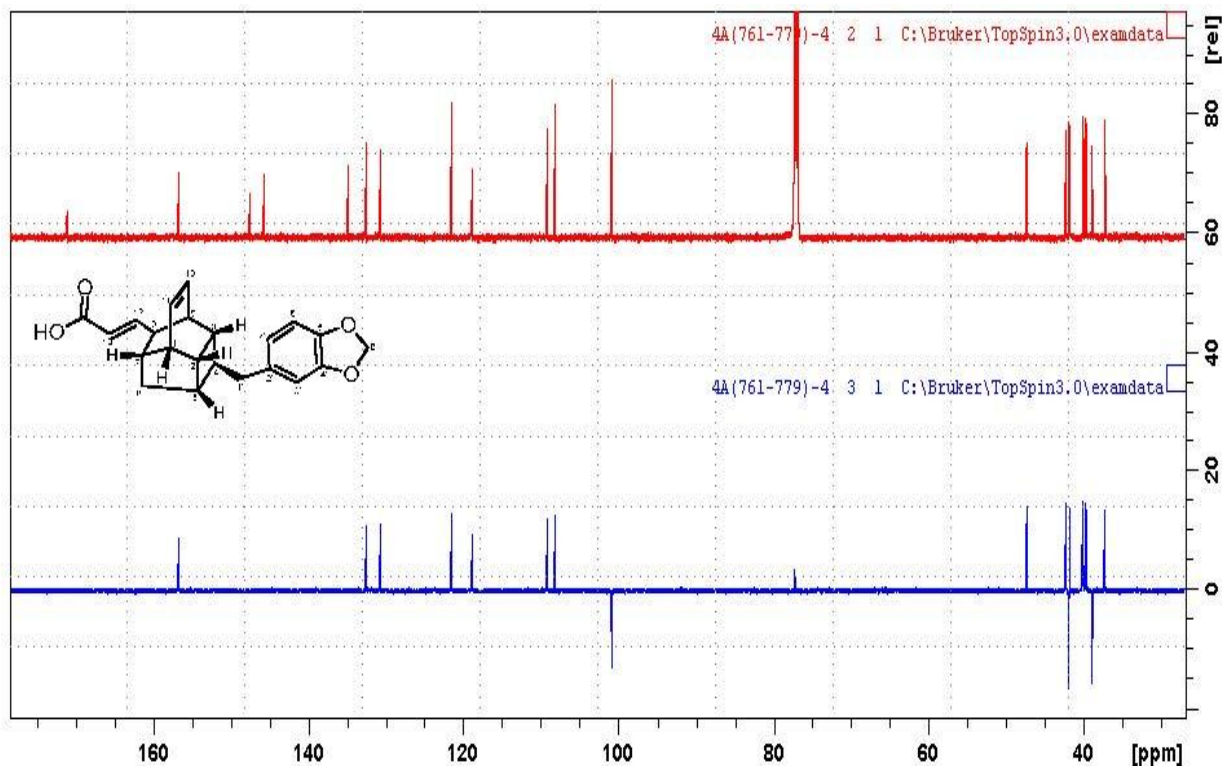



Figure S36. HRESIMS of endiandric acid 10.

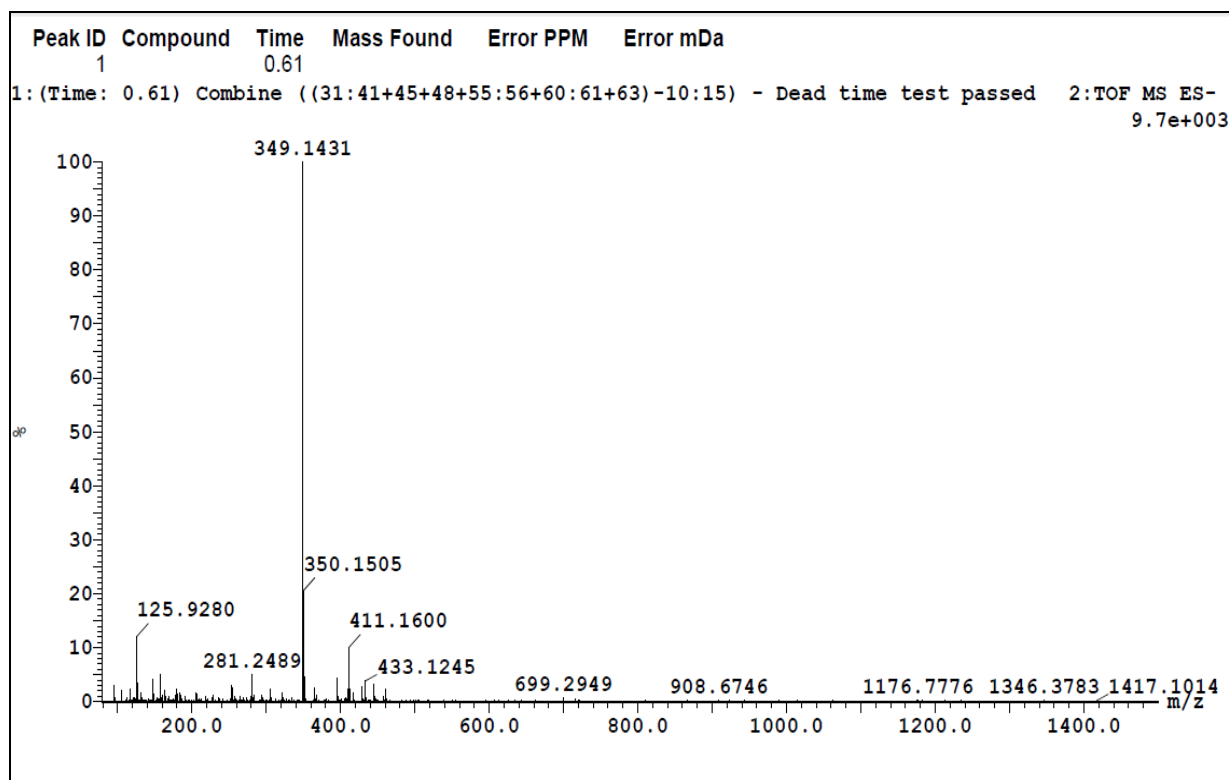Figure S37.  $^1\text{H-NMR}$  endiandric acid 10 in  $\text{CDCl}_3$  at 600 MHz.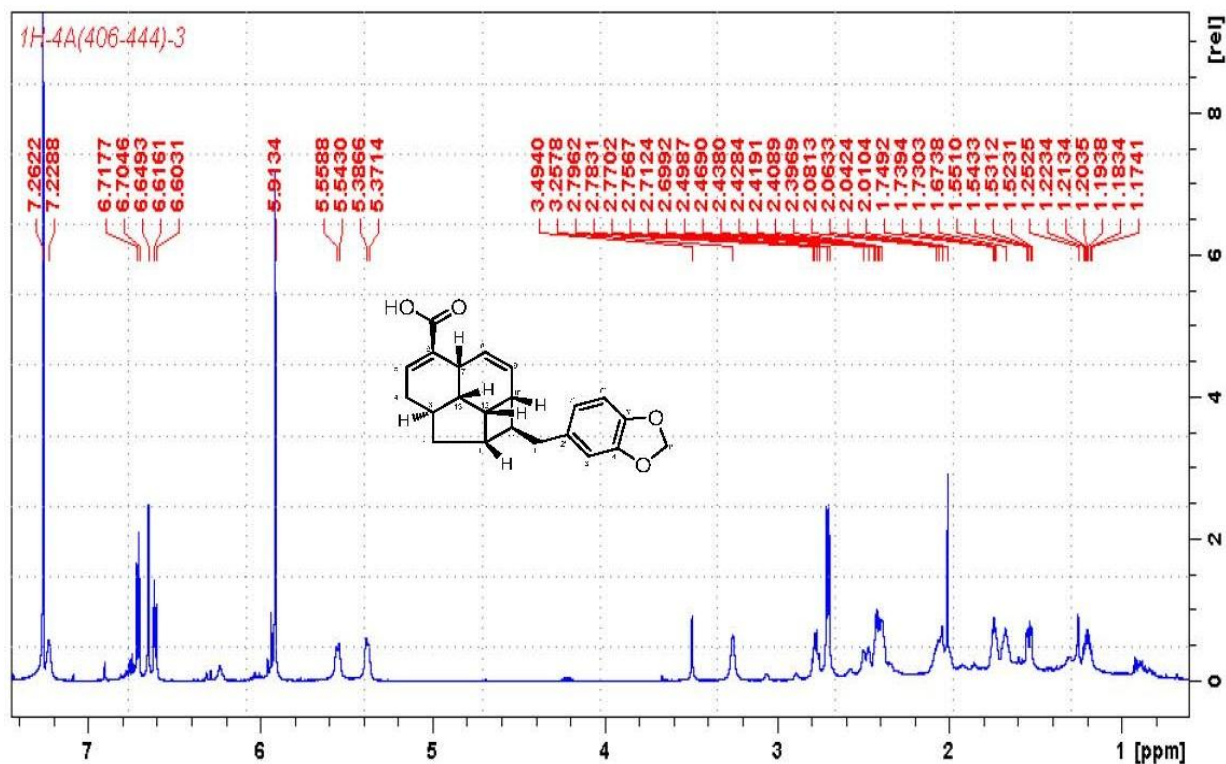

**Figure S38.**  $^{13}\text{C}$ -NMR endiandric acid **10** in  $\text{CDCl}_3$  at 150 MHz.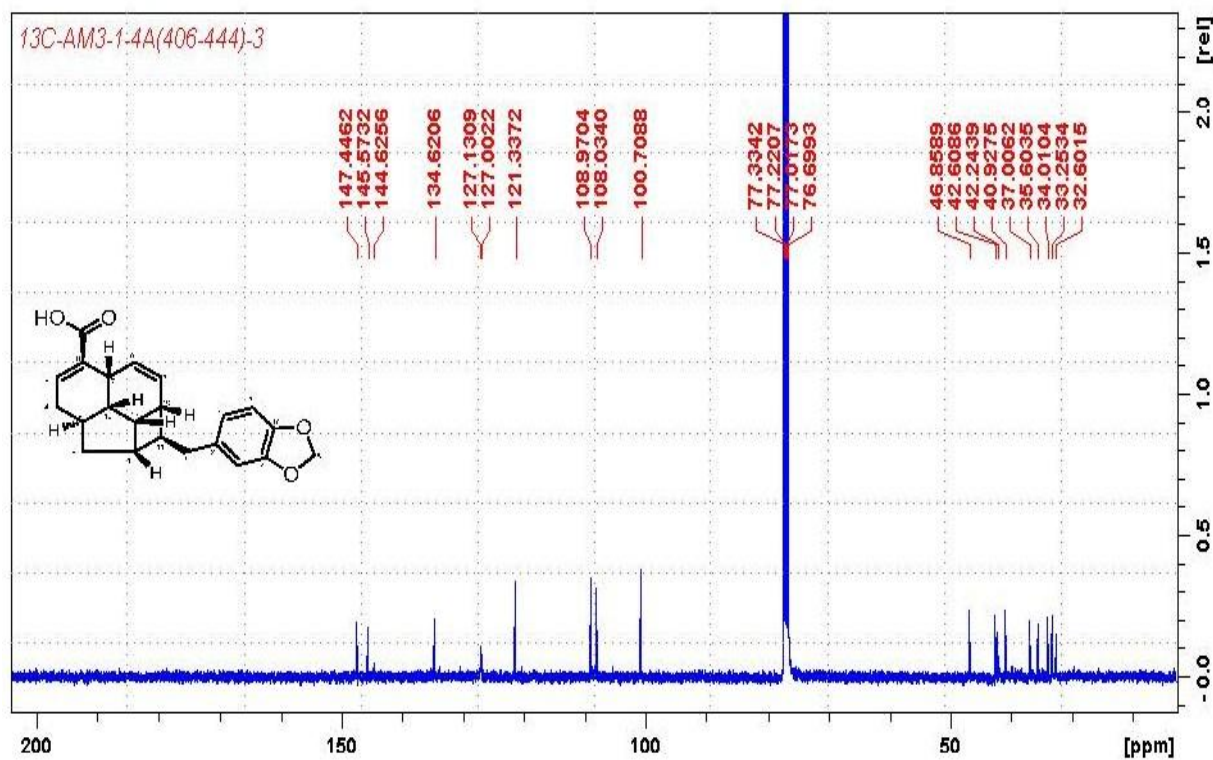**Figure S39.** DEPT135 endiandric acid **10** in  $\text{CDCl}_3$ .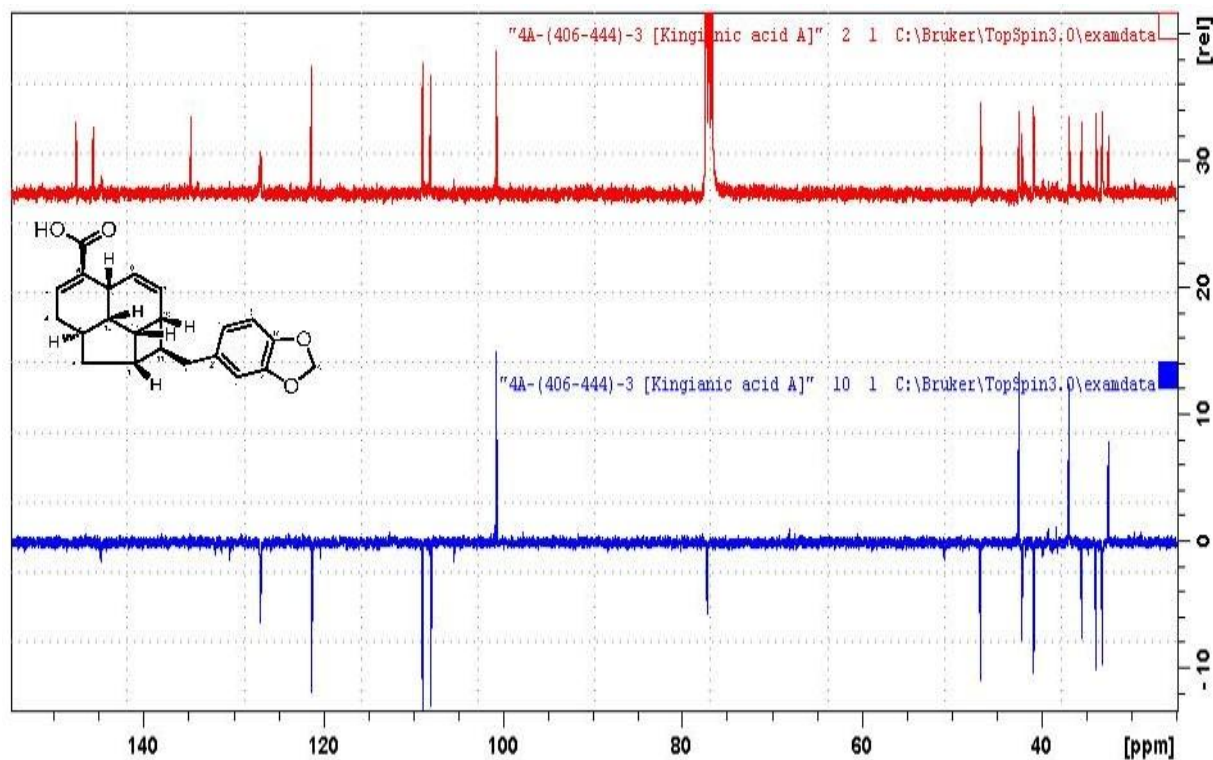

Sequences alignment of Bcl-xL and Mcl-1 with Bak-BH3 and Bid-BH3 peptides, respectively.

Both protein targets include an N-terminal His-tag followed by the thrombin cleavage site, to facilitate purification. Our Bcl-xL construct includes the four homology domains of the human protein, whereas our Mcl-1 construct includes the three homology domains of the mouse protein. Trans-membrane domains have been deleted in both sequences.

|               |                                                                                              |
|---------------|----------------------------------------------------------------------------------------------|
| Bak (PolyP) → | -----GQ----- 2                                                                               |
| Bcl-xL(ICSN)→ | MHHHHHHSSGLVPRGSEFMSQ <b>SNRELVVDFLSYKLSQKGYSW</b> SQFSDVEENRTE<br>APEGTE 60                 |
| Bak (PolyP) → | --- <b>VGRQLAIGDDINR</b> ----- 16                                                            |
| Bcl-xL(ICSN)→ | SEA <b>VKQALREAGDEFELR</b> YRRAFSDLTSQLHITPGTAYQSFEQVNV <b>ELFRDGVNW</b><br><b>GRIVA</b> 120 |
| Bak (PolyP) → | -----                                                                                        |
| Bcl-xL(ICSN)→ | <b>FFSFGG</b> ALCVESVYKEMQVLVSRIAAWMATYLN <b>DHLEPWIQENGGWDTFVELY</b> G<br>174               |

- BH4 domain
- BH3 domain
- BH1 domain
- BH2 domain

|               |                                                                                                               |
|---------------|---------------------------------------------------------------------------------------------------------------|
| Bid (PolyP) → | -----EDII----- <b>RN</b> I 7                                                                                  |
| Mcl-1 (ICSN)→ | MGSSHHHHHHSSGLVPRGSHMEDDLRQ <b>SLEIISRYLRE</b> QATGSKDSKPLGEAGA<br>AG <b>RR</b> A 60                          |
| Bid (PolyP) → | <b>ARHLAQVGDSMDR</b> ----- 20                                                                                 |
| Mcl-1 (ICSN)→ | <b>LETLRRVGDGVQRN</b> HETAFQ <b>GMLRKL</b> DIKNEG <b>DVKSFSRVMVH</b> <b>VFKDGV</b> TNWG<br><b>RIVTLIS</b> 120 |
| Bid (PolyP) → | -----                                                                                                         |
| Mcl-1 (ICSN)→ | <b>FGAFVAKHLKSVNQESFIEPLAETITDVLV</b> RTKR <b>DWL</b> VK <b>QRGW</b> DFVEFF <b>HVQD</b><br>LE 176             |

- BH3 domain
- BH1 domain
- BH2 domain
